# Supplementary material for: Polyclonal Antibody Production for Membrane Proteins via Genetic Immunization
Source: PubMed Central journal article supplement (PMC4764931; doi:10.1038/srep21925), 2016-02-24
Supplement: srep21925-s1.pdf [file srep21925-s1.pdf]

Supplementary Information for  
**Polyclonal Antibody Production for Membrane  
Proteins *via* Genetic Immunization**

Debra T. Hansen, Mark D. Robida, Felicia M. Craciunescu, Andrey V. Loskutov, Katerina Dörner,  
John-Charles Rodenberry, Xiao Wang, Tien L. Olson, Hetal Patel, Petra Fromme, Kathryn F. Sykes

| <b>Contents</b>             | <b>page</b> |
|-----------------------------|-------------|
| Supplementary Methods       | S2          |
| Supplementary Figures 1 – 5 | S3          |
| Supplementary Tables 1 – 4  | S25         |
| Supplementary References    | S32         |

## SUPPLEMENTARY METHODS

**Storage of splenocytes.** Monoclonal antibody production does not require specialized procedures when combined with genetic immunization, however, the use of the A/J mouse strain to generate hybridomas is addressed here. The A/J strain has been used previously to generate monoclonal antibodies upon splenocyte fusion with a BALB/c-derived myeloma cell line and propagation in ascites within BALB/c mice or hybrid (BALB/c X A/J) CAF<sub>1</sub> mice<sup>1-3</sup>. For later monoclonal production, B cells were isolated from the mice described in Supplementary Figs. 2 and 3 and stored as follows, based on established protocols<sup>4-6</sup>. A freshly-isolated spleen was transferred to 15 mL of RPMI-1640 Medium (ATCC #30-2001). The following steps were done sterilely and at room temperature. The spleen was smashed in a small sterile petri dish with 5 mL of the medium and using the flat end of a plunger from a 10 mL syringe. Cells were passed through a cell strainer with 40 µm nylon mesh (BD #352340) that was set atop a 50 mL tube. The remaining medium was used to rinse the plunger and mesh. The cells were transferred to a 15 mL tube, debris was allowed to settle for 2 min, the supernatant was transferred back to the 50 mL tube, and the debris discarded. Cells were centrifuged at 800g for 5 min, and the supernatant was decanted and discarded. 10 mL of fresh medium was added, centrifugation was repeated, and the supernatant discarded. A 2 mL volume of Red Blood Cell Lysing Buffer, Hybri-Max (Sigma #R7757), was used to completely suspend the cells by gentle pipetting, followed by incubation for 1 min, and then addition of 10 mL of medium. Cells were washed twice by centrifugation and suspension in 10 mL and then 5 mL of medium. Cells were passed through 40 µm mesh and maintained at 37 °C until use. Live cells counts used Trypan Blue Solution, 0.4% (w/v) in normal saline (CellGro #25-900-CI). Cells were adjusted to 10<sup>7</sup> cells/mL by centrifugation and suspension in 90% Fetal Bovine Serum, Heat Inactivated (Gibco #10438-026), and 10% tissue culture grade DMSO. 1 mL of cells was transferred to a 2 mL cryovial, which was placed in a room-temperature cryocooler and stored at -80 °C for 1-2 days until transfer to -150 °C.

## SUPPLEMENTARY FIGURES

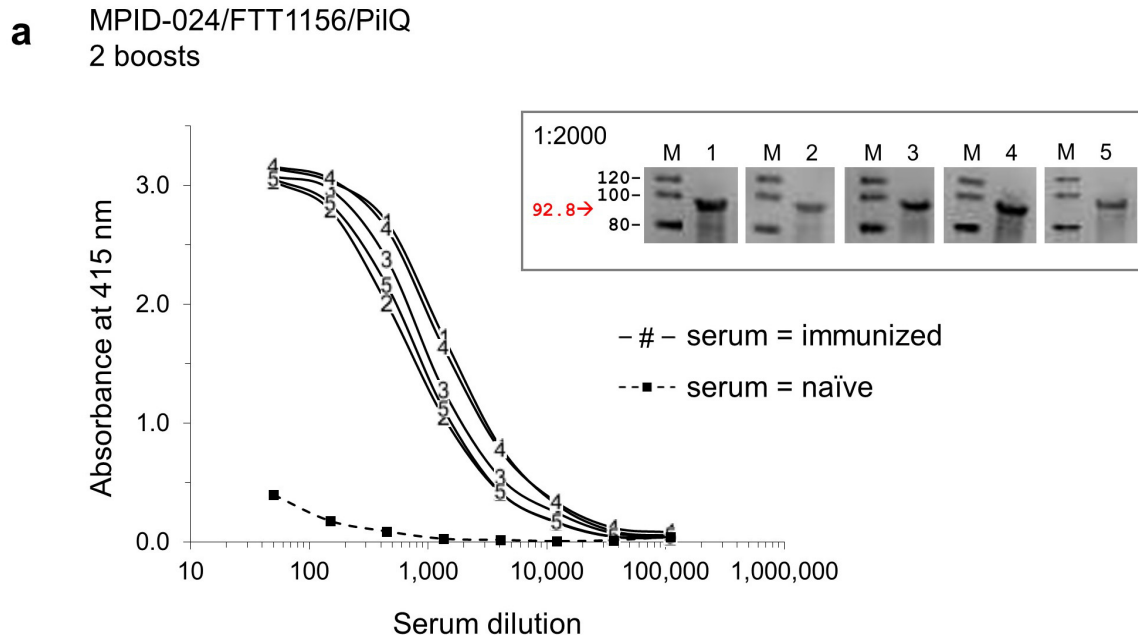

**Supplementary Figure 1. Reactivity by ELISA and Western of sera from mice immunized with pCMVi-LSrCOMPTT constructs.** Mice were immunized with pCMVi-LSrCOMPTT constructs that encode for 17 membrane proteins from *F. tularensis* and ASFV. (a) PilQ. (b) OMEP. (c) BamA. (d) TolC. (e) FopA. (f) FupA. (g) FupB. (h) FTT0759. (i) Flpp3 lipoprotein. (j) FTT1525. (k) CapA. (l) CapB. (m) CapC. (n) FTT1406. (o) p54 (Malawi). (p) CD2v. (q) C-type lectin. The total number of boosts by genetic immunization are listed. Immunization conditions are detailed in the Methods. Antigen with a C-terminal GFP was used in ELISAs and immunoblots and was generated by IVT-HMB using pRSET-natGFP constructs. Exceptions were the two partial-length targets (Fig. 1c): FTT0759 antigen fragments were derived from linear expression elements (LEEs)<sup>7</sup> encompassing amino acids 1-158 and 149-250, and CD2v antigen fragments were from LEEs encompassing amino acids 10-202 and 170-355. The FTT0759 and CD2v LEEs generated target protein fusions containing thioredoxin and a His-tag (diagrams of these constructs are in Supplementary Fig. 5a,d). The numbers in the ELISA graphs and above the immunoblots indicate the corresponding mouse number. Reactivity was determined for individual mice or for a pool containing an equal volume of serum from each of the available mice. “Naïve” indicates serum from one untreated mouse. For the ELISAs, each well contained 100 ng of target protein. Antigen from mock IVT-HMB reactions was generated in the absence of template DNA. For immunoblots, each lane contained 125 ng of target protein. Lanes containing molecular weight marker are indicated (M). Red text indicates the expected molecular weight of the IVT-HMB membrane protein product; migration outside of the expected position is typical of membrane proteins due to partial denaturation by detergents<sup>8,9</sup>. The serum dilution used in the immunoblots is listed in the immunoblot inset. Not shown are negative immunoblots, which were defined as blots that fulfilled any of the following criteria: (i) absence of a band within 20 kDa of the expected molecular weight; (ii) presence of the same apparent band in a lane containing 0.5 µg of total protein from *E. coli* BL21(DE3) that was not transformed with the target ORF; or (iii) presence of the same apparent band in a lane containing product from a comparable volume of an IVT-HMB reaction that lacked template DNA.

Supplementary Figure 1 (continued)

**b** MPID-025/FTT1258/OMEP  
2 boosts

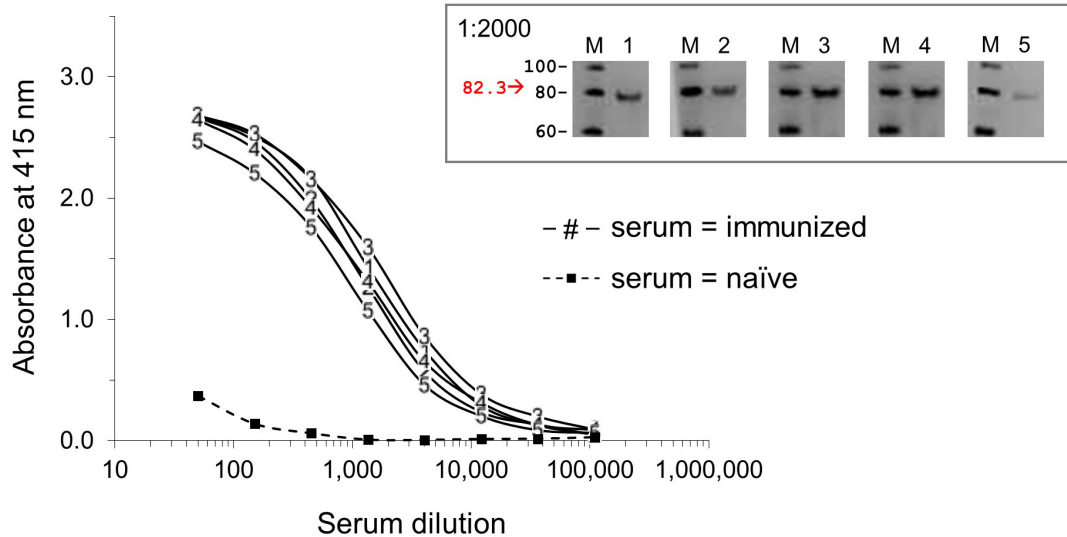

**c** MPID-026/FTT1573/BamA  
3 boosts

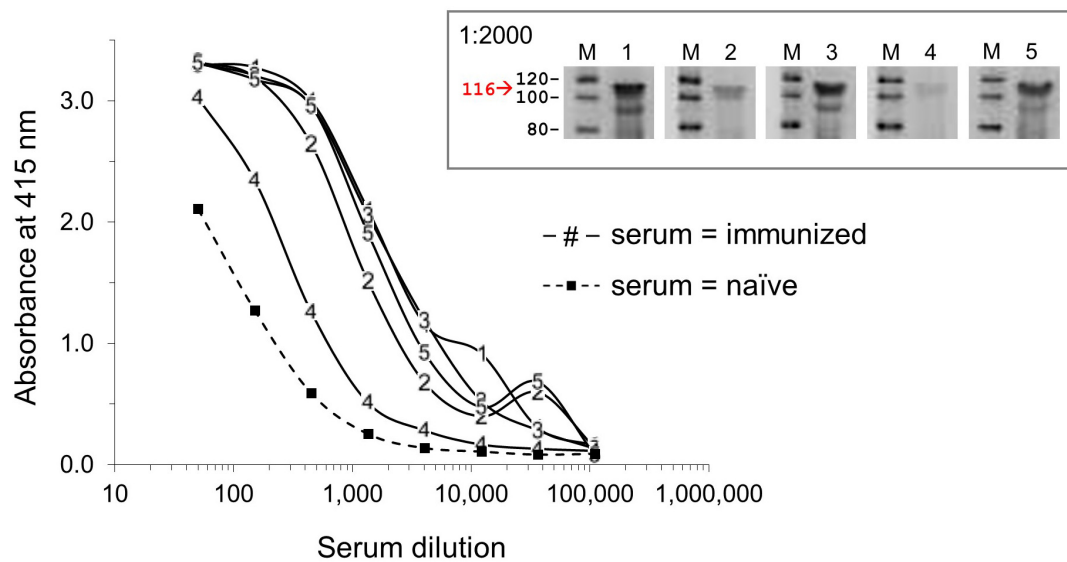

Supplementary Figure 1 (continued)

**d** MPID-027/FTT1724/ToIC  
3 boosts

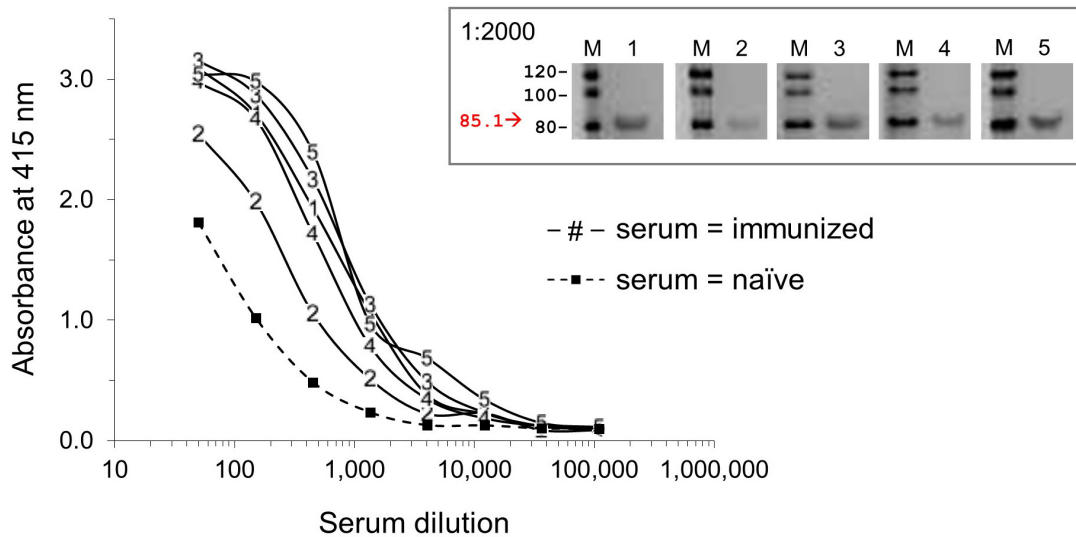

**e** MPID-028/FTT0583/FopA  
2 boosts

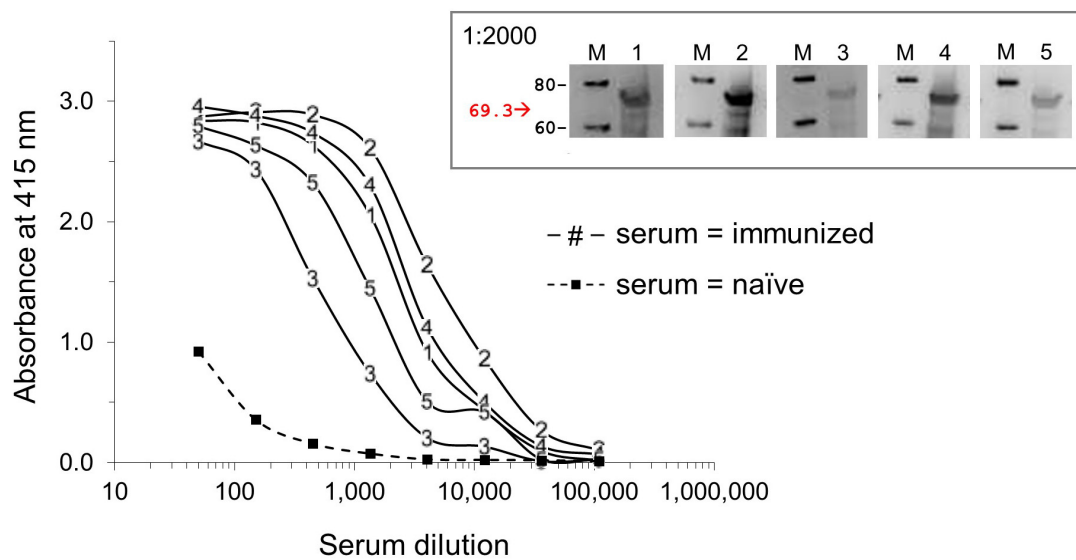

Supplementary Figure 1 (continued)

**f** MPID-029/FTT0918/FupA  
2 boosts

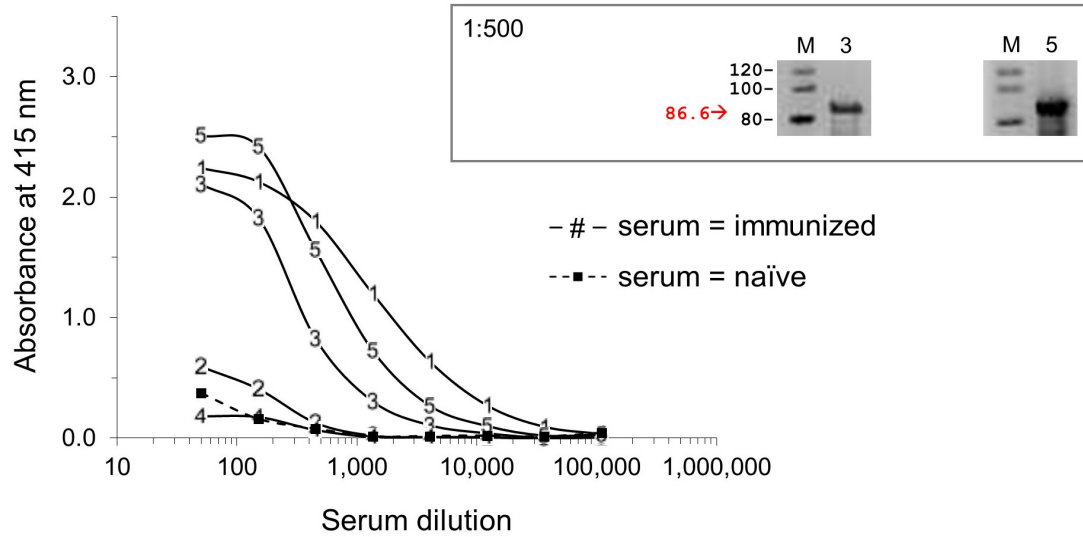

**g** MPID-030/FTT0919/FupB  
3 boosts

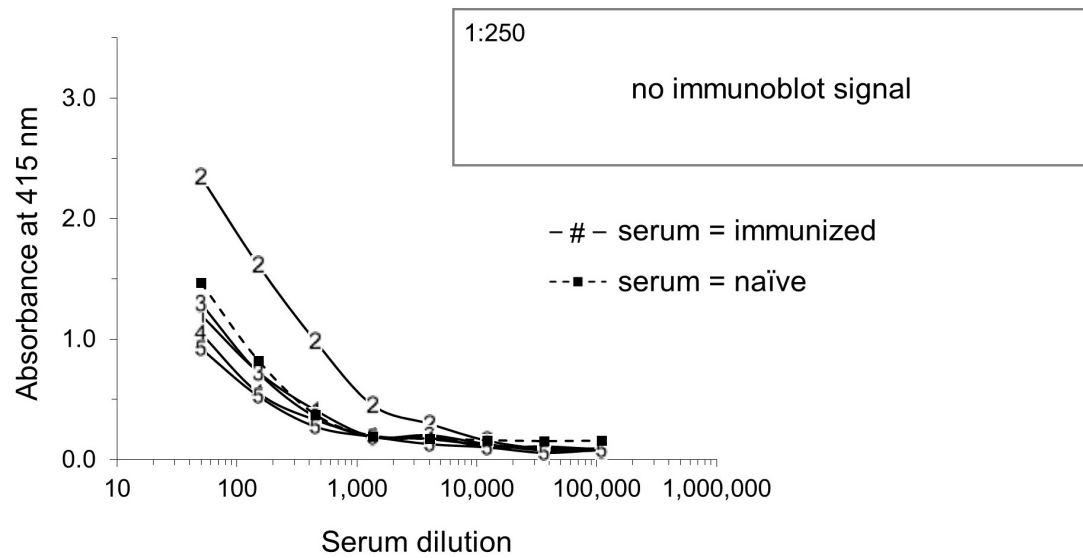

Supplementary Figure 1 (continued)

**h** MPID-032/FTT0759/hypothetical membrane protein  
2 boosts

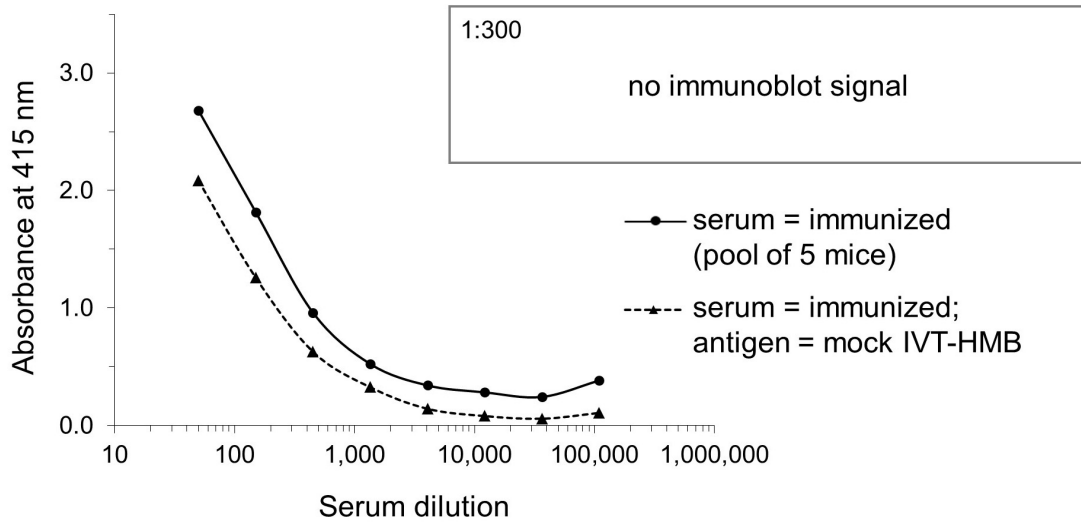

**i** MPID-033/FTT1416/Flpp3 lipoprotein  
2 boosts

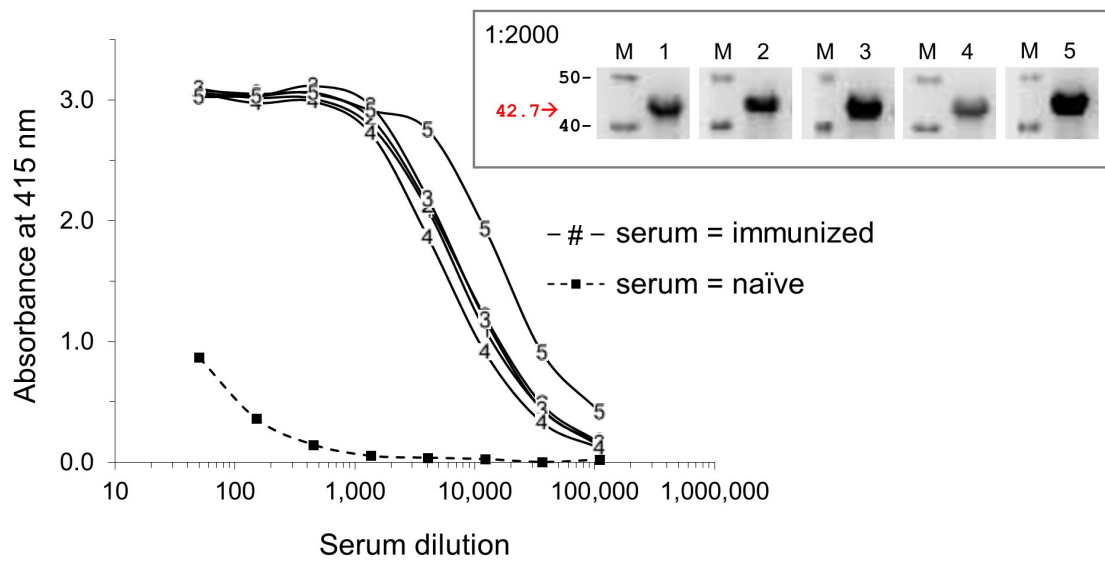

Supplementary Figure 1 (continued)

**j** MPID-034/FTT1525/hypothetical membrane protein  
2 boosts

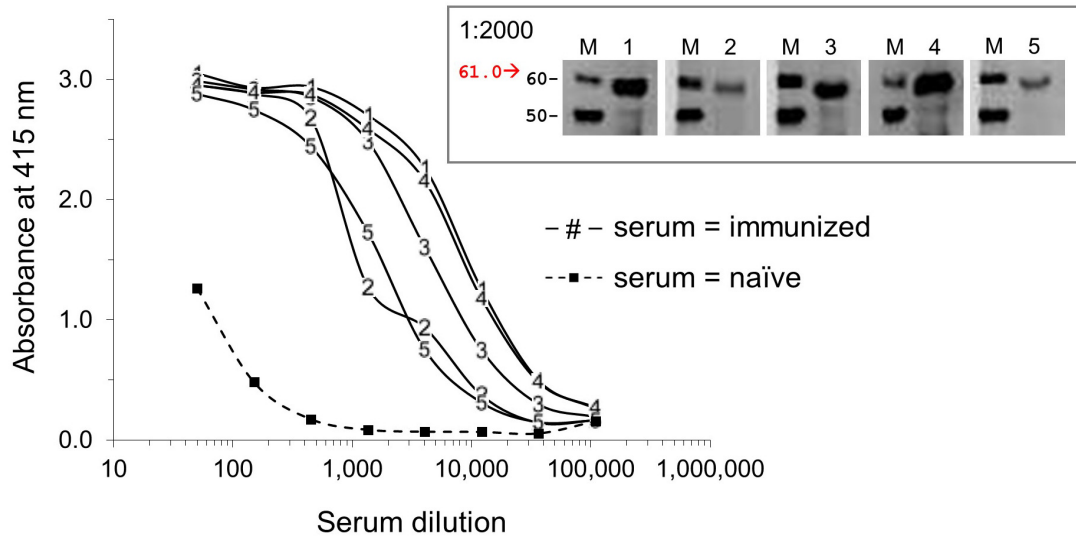

**k** MPID-035/FTT0807/CapA  
4 boosts

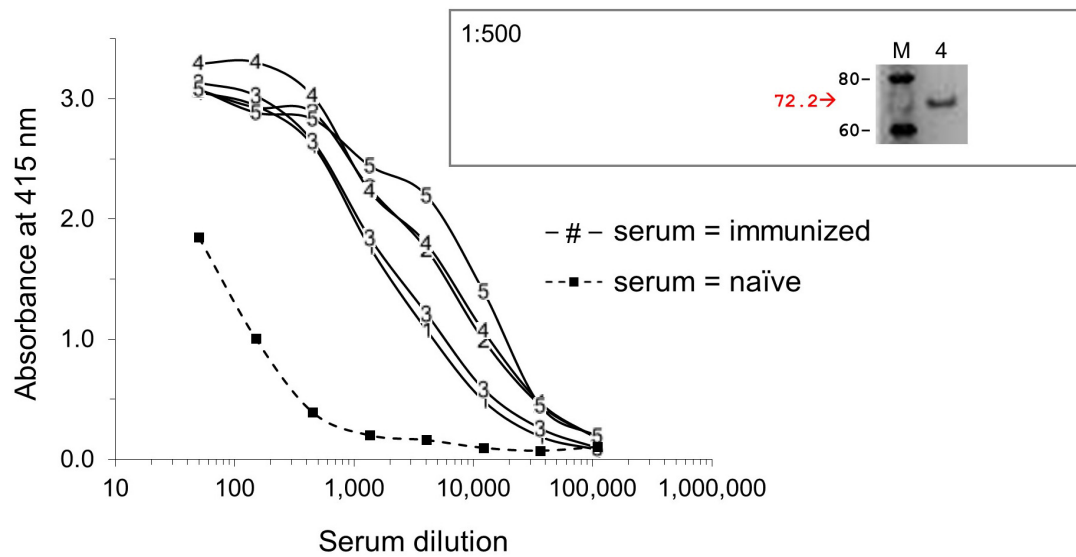



Supplementary Figure 1 (continued)

**l** MPID-036/FTT0805/CapB  
3 boosts

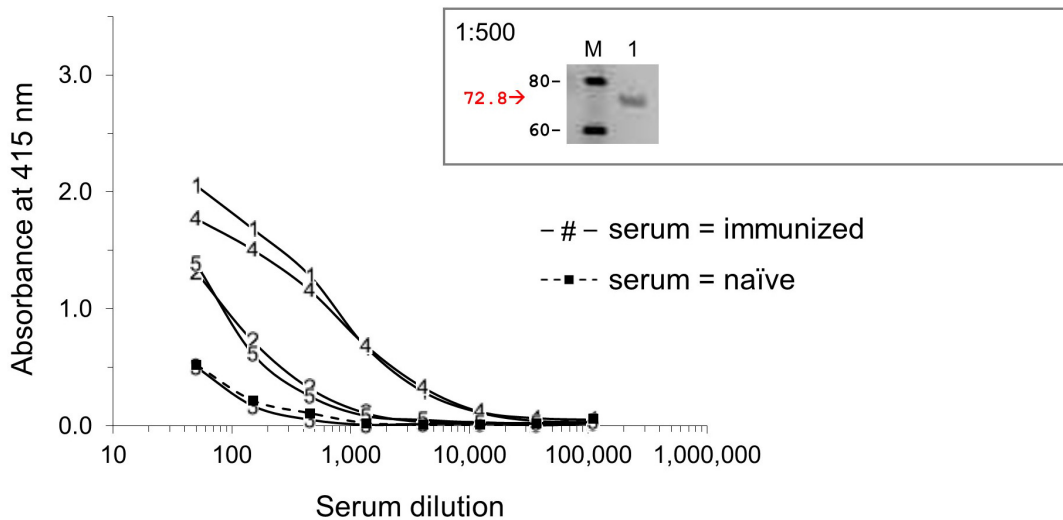

**m** MPID-037/FTT0806/CapC  
2 boosts

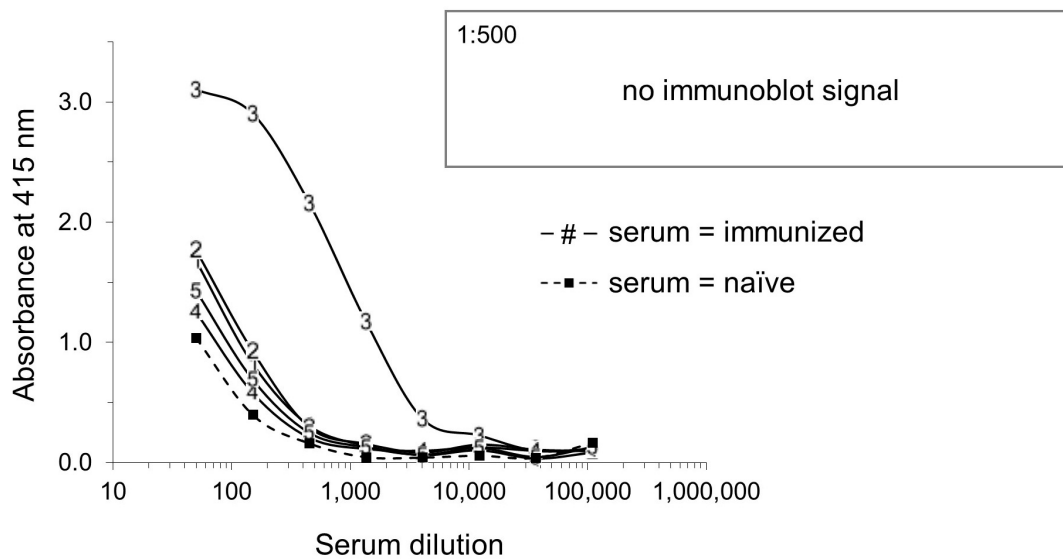

Supplementary Figure 1 (continued)

**n** MPID-051/FTT1406/hypothetical membrane protein  
4 boosts

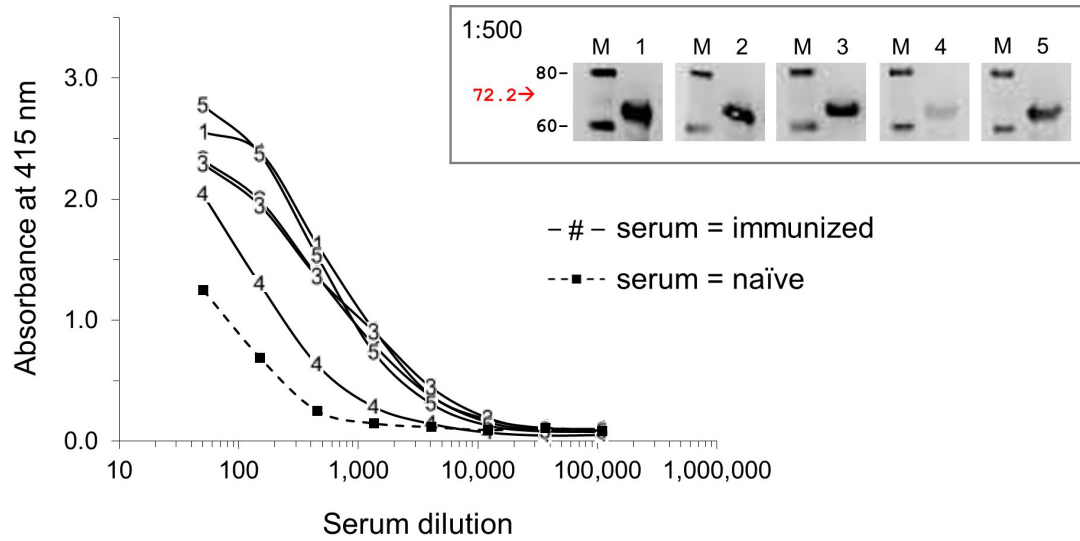

**o** MPID-021/E183L/p54 envelope protein (Malawi)  
4 boosts

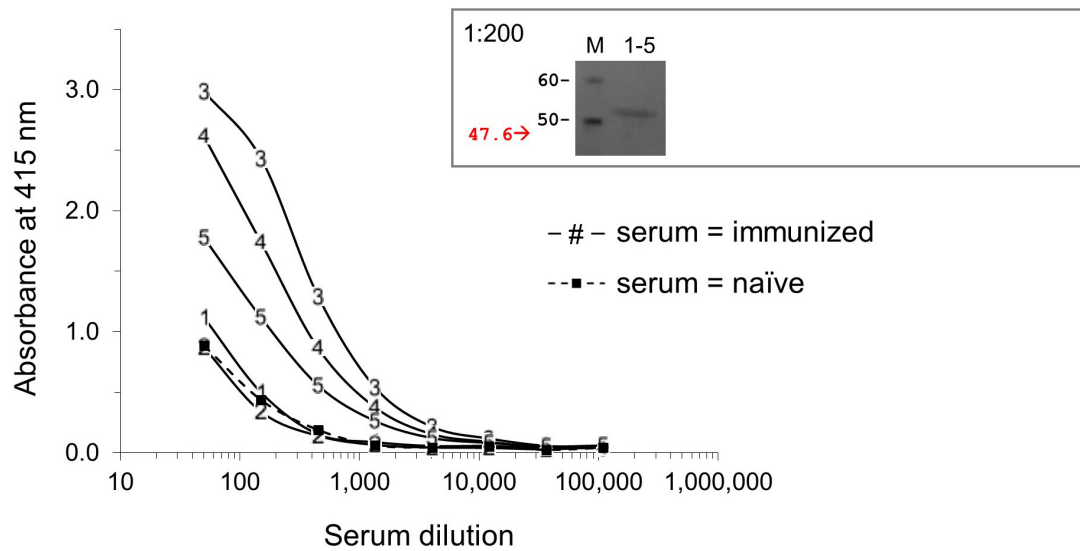

Supplementary Figure 1 (continued)

**p** MPID-022/EP402R/CD2v  
4 boosts

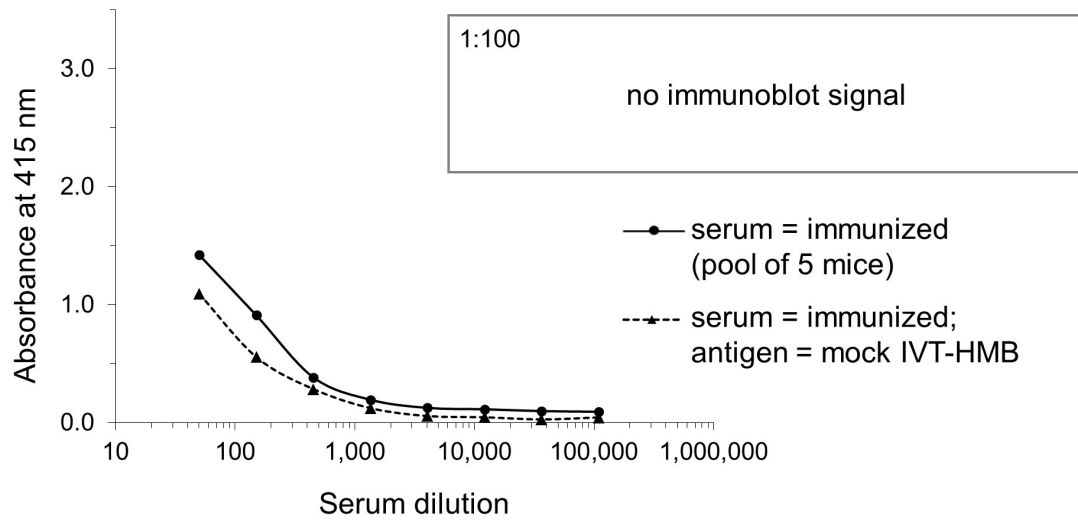

**q** MPID-023/EP153R/C-type lectin-like protein  
4 boosts

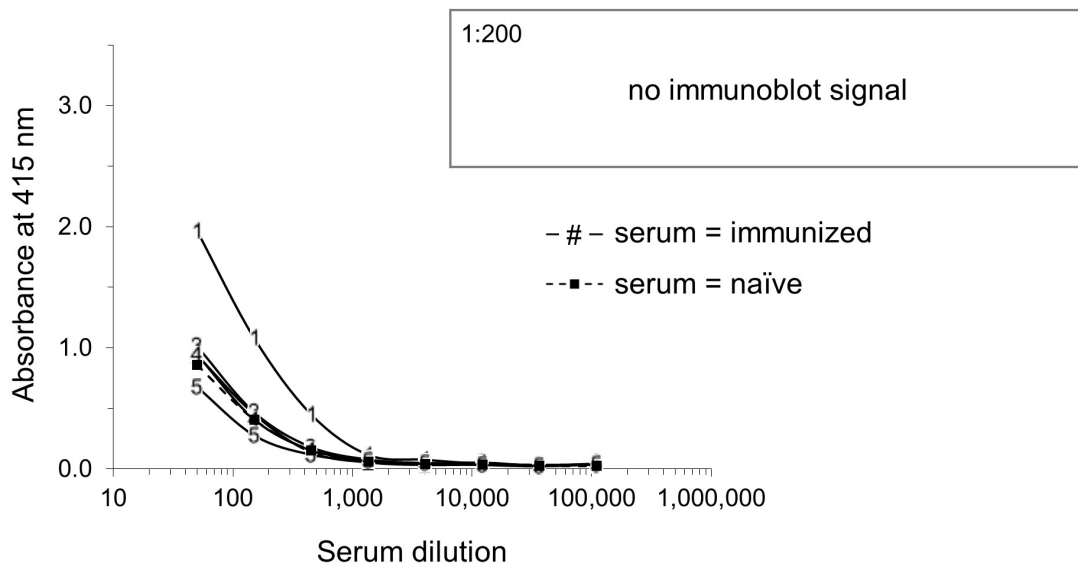

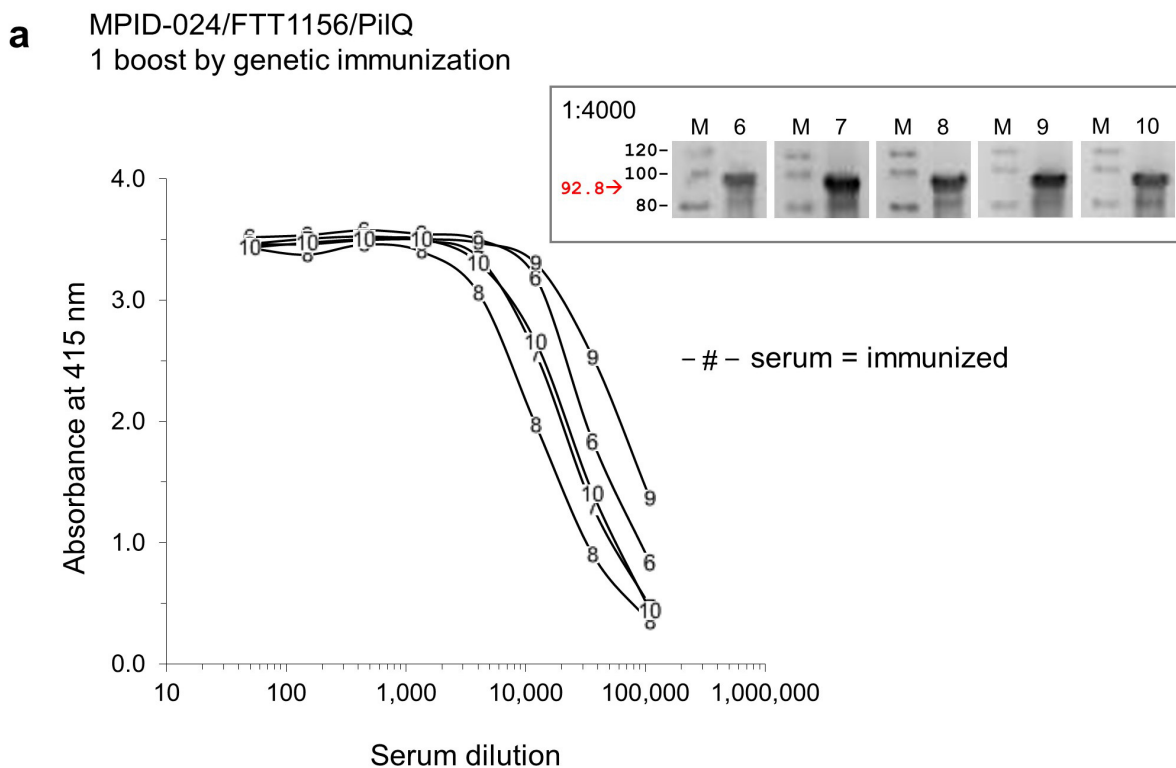

**Supplementary Figure 2. Sera reactivity for five targets upon immunization with pCMVi-LSrCOMPTT constructs, plus some IVT-HMB protein boosts.** Adjuvants were altered from those in Supplementary Fig. 1 to replace Class C CpG with Class B, and to include pCMVi-LS-LTA-R192G and pCMVi-LTB in all immunization steps. Other details are as described in Supplementary Fig. 1. Numbering of mice is continued from Supplementary Fig. 1. To increase titers after 2 genetic boosts, IVT-HMB protein was injected intraperitoneally as 1 or 2 additional boosts. IVT-HMB protein was derived from pET-32b-TEV constructs (Supplementary Fig. 4), which yields different protein fusion tags from those used in the ELISA and immunoblot analyses. **(a)** PilQ following DNA boost #1. **(b)** OMEP following DNA boost #1, and **(c)** DNA boost #2. **(d)** BamA following DNA boost #1, **(e)** DNA boost #2, and **(f)** IVT-HMB boost #1. **(g)** Flpp3 lipoprotein following DNA boost #1. **(h)** FTT1406 following DNA boost #1, **(i)** DNA boost #2, **(j)** IVT-HMB boost #1, and **(k)** IVT-HMB boost #2. The immunoblot in **(j)** for FTT1406 mouse #10 lacked bands near the expected molecular weight and so was not shown.

Supplementary Figure 2 (continued)

**b** MPID-025/FTT1258/OMEP  
1 boost by genetic immunization

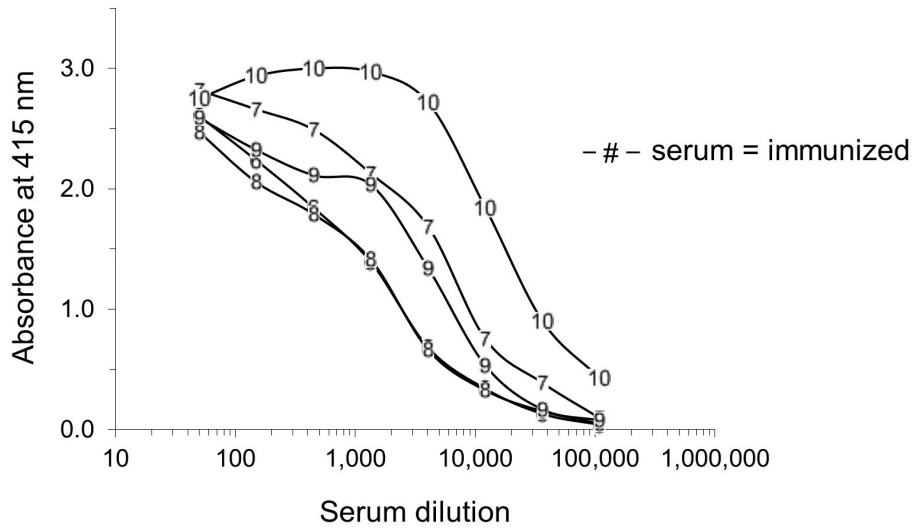

**c** MPID-025/FTT1258/OMEP  
2 boosts by genetic immunization

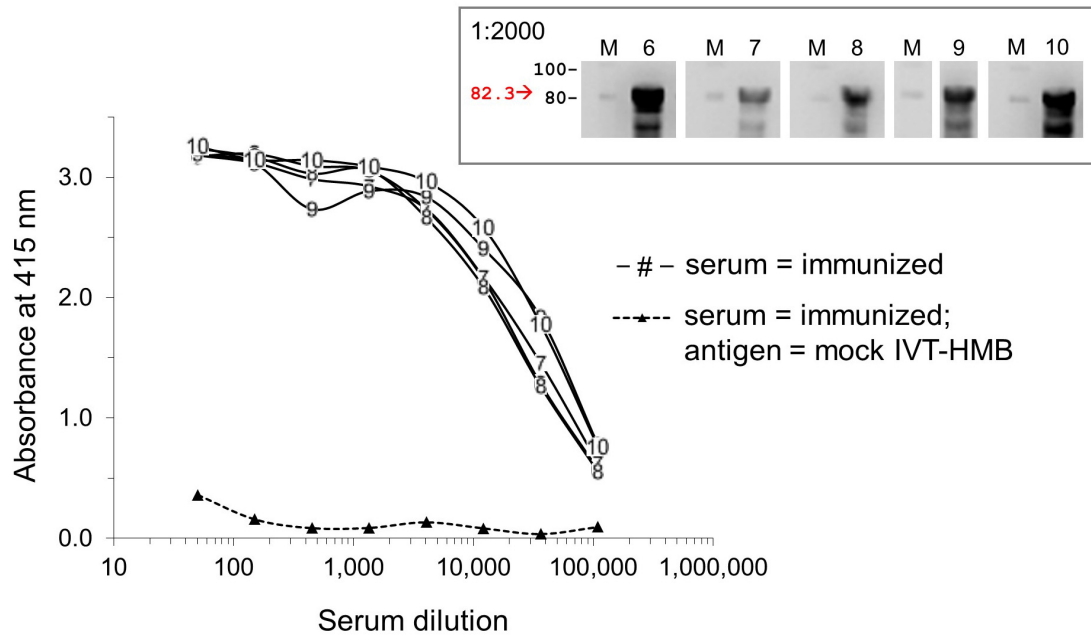

Supplementary Figure 2 (continued)

**d** MPID-026/FTT1573/BamA  
1 boost by genetic immunization

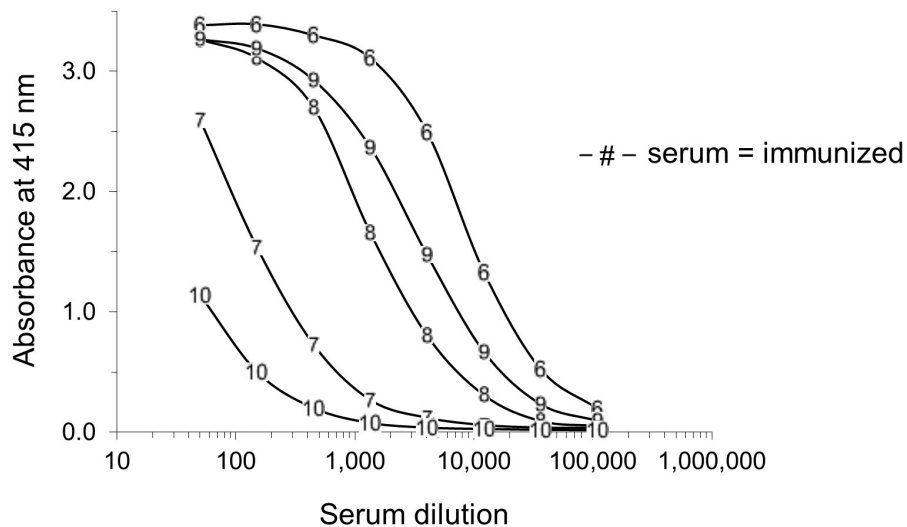

**e** MPID-026/FTT1573/BamA  
2 boosts by genetic immunization

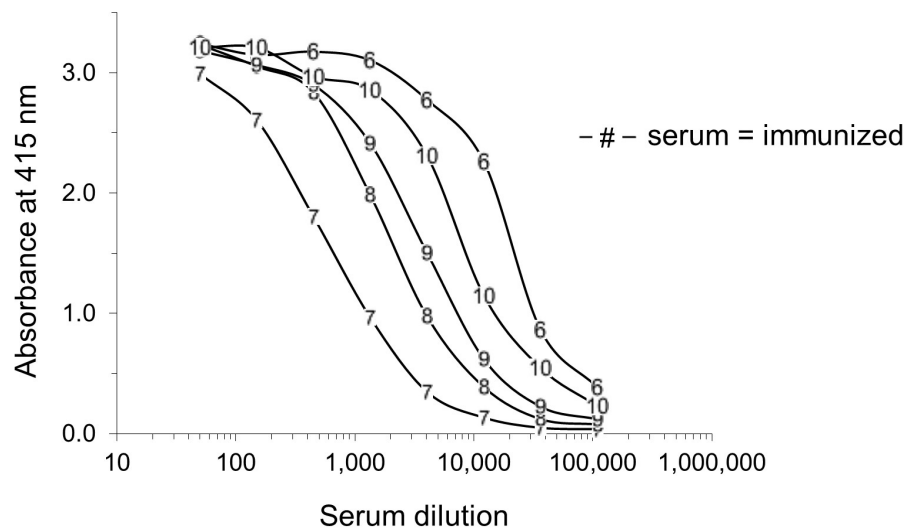

Supplementary Figure 2 (continued)

**f** MPID-026/FTT1573/BamA  
2 boosts by genetic immunization + 1 boost with IVT-HMB

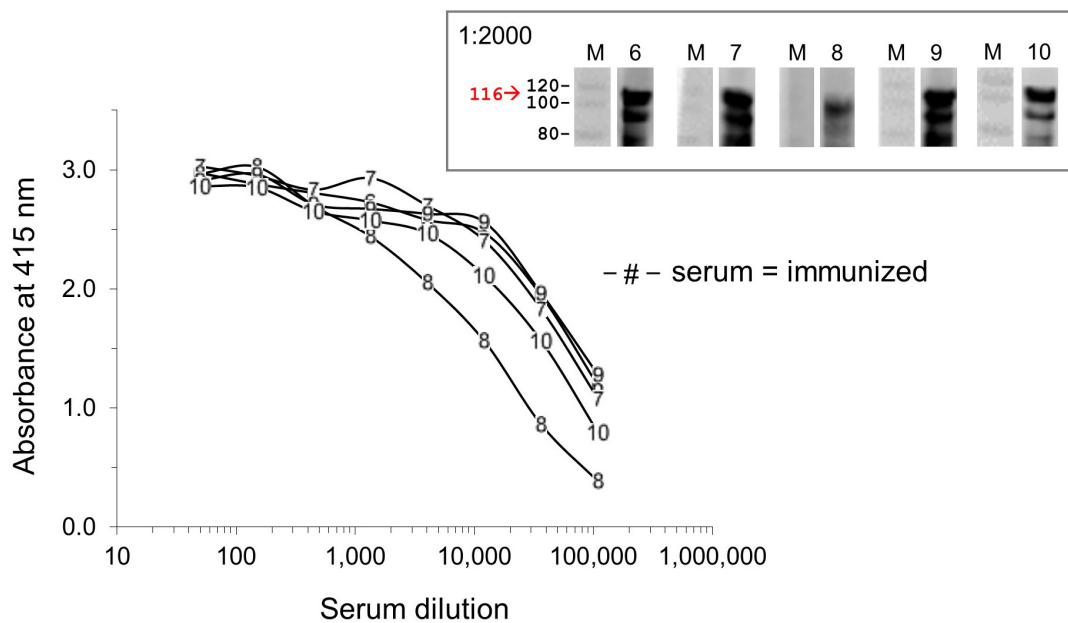

**g** MPID-033/FTT1416/Flpp3 lipoprotein  
1 boost by genetic immunization

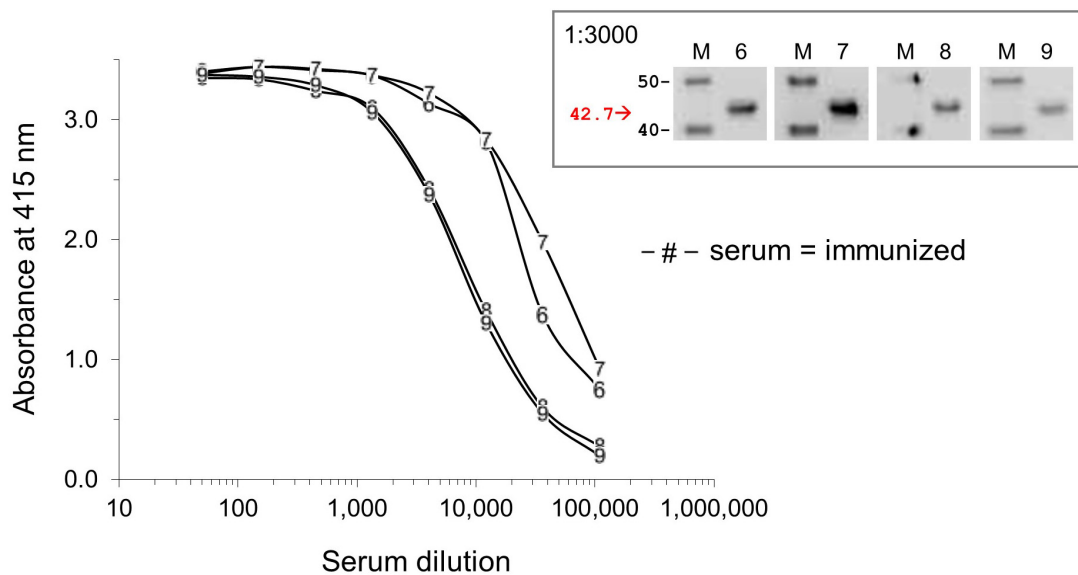

Supplementary Figure 2 (continued)

**h** MPID-051/FTT1406/hypothetical membrane protein  
1 boost by genetic immunization

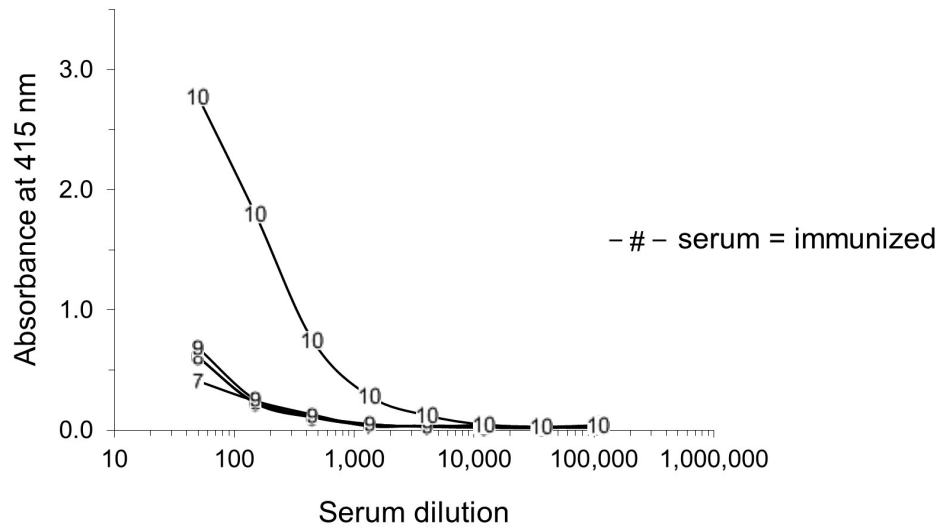

**i** MPID-051/FTT1406/hypothetical membrane protein  
2 boosts by genetic immunization

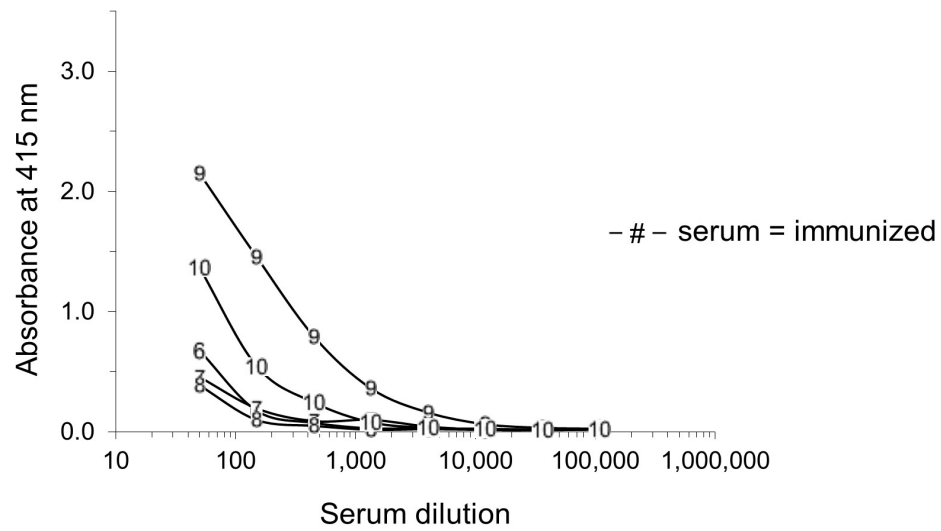



Supplementary Figure 2 (continued)

**j** MPID-051/FTT1406/hypothetical membrane protein  
2 boosts by genetic immunization + 1 boost with IVT-HMB

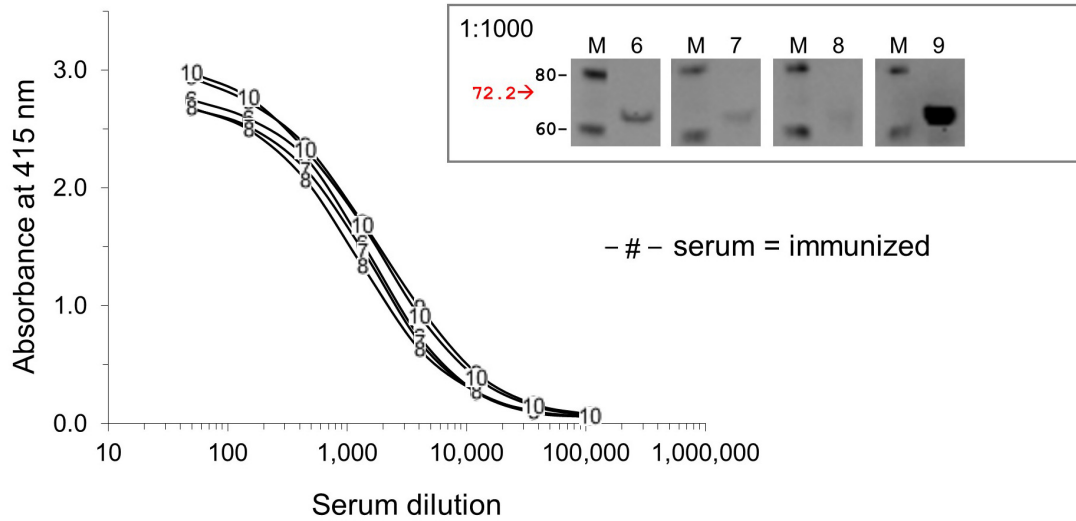

**k** MPID-051/FTT1406/hypothetical membrane protein  
2 boosts by genetic immunization + 2 boosts with IVT-HMB

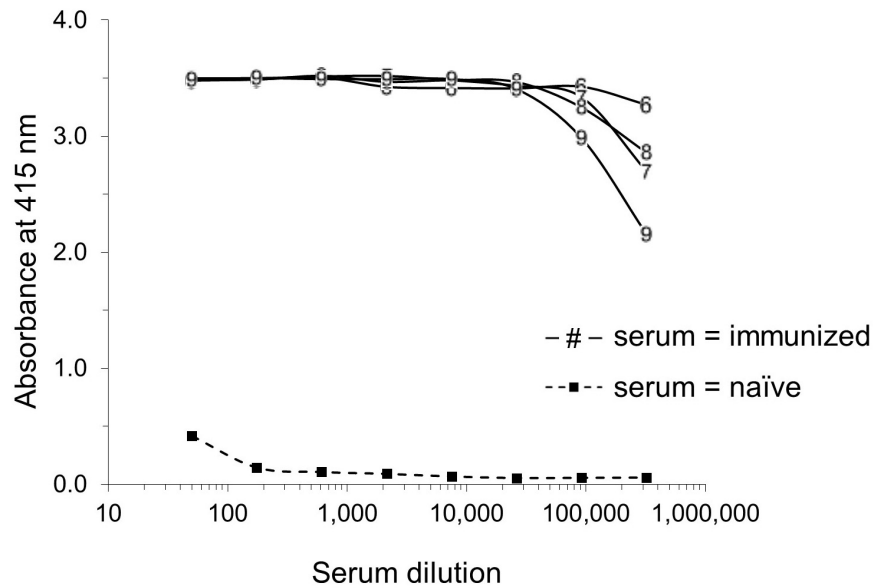

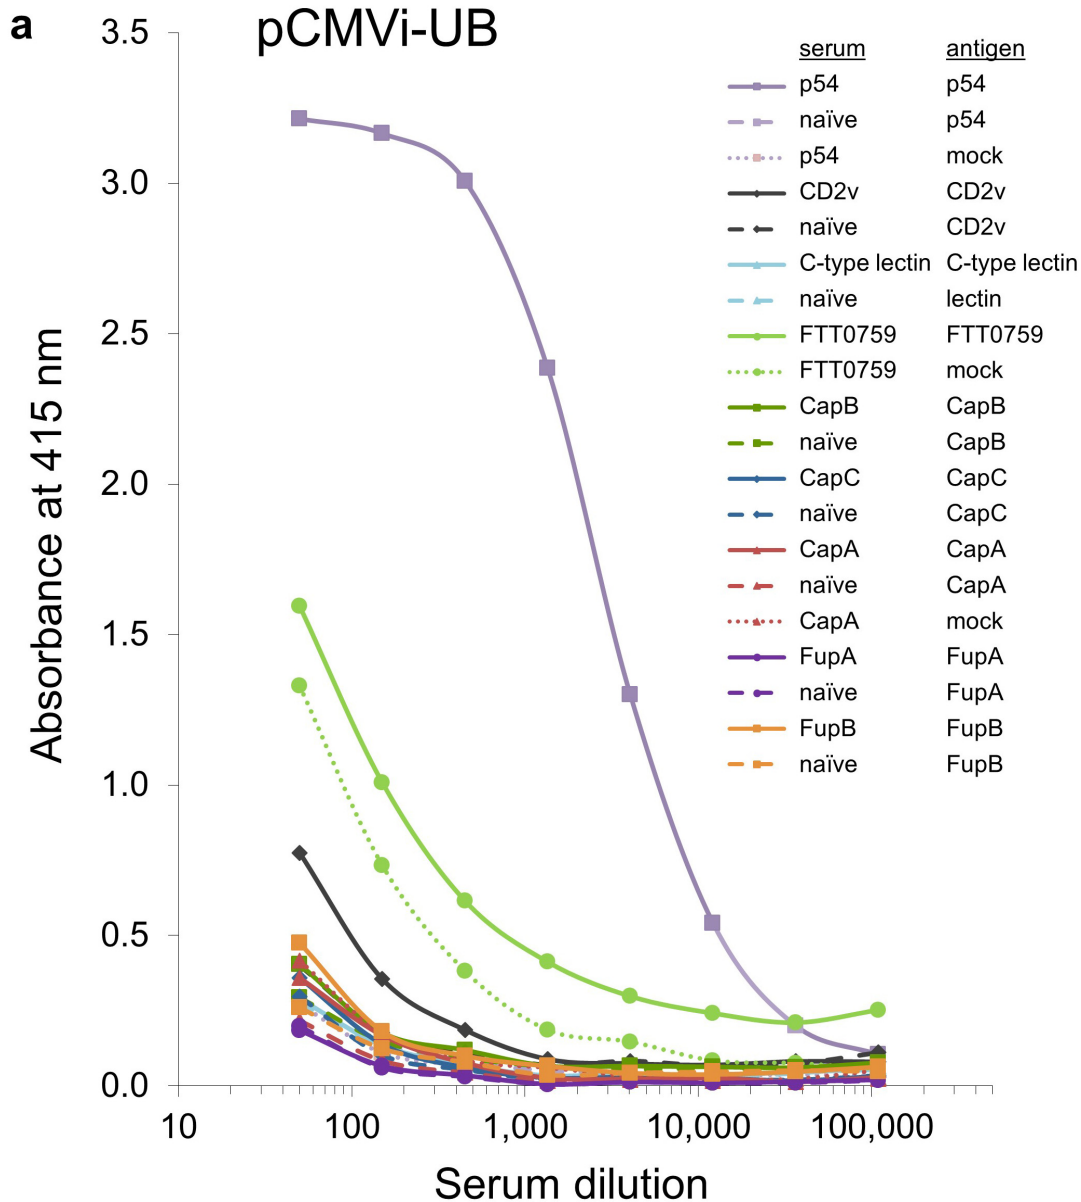

**Supplementary Figure 3. Reactivity of sera from mice immunized with pCMVi-UB constructs that encode for nine membrane proteins.** Details are as described in Supplementary Fig. 1. Membrane protein targets attempted were only those that yielded little or no sera reactivity upon immunization with pCMVi-LSrCOMPTT constructs (Fig. 2d). **(a)** ELISA results from sera following a single boost by genetic immunization. Sera were analyzed as a pool of equal volumes of serum from the available mice. The legend indicates the corresponding target used to immunize mice (“serum”) or added to the ELISA wells in the form of IVT-HMB protein (“antigen”). “Mock” indicates IVT-HMB products from reactions that lacked template DNA. **(b)** Positive immunoblots from five mice immunized with a pCMVi-UB construct containing p54 from the Georgia isolate of ASFV. Sera were obtained following a single boost by genetic immunization. **(c)** Immunoblot from a pool of sera from these five mice following two additional boosts by intraperitoneal injection of p54 protein obtained from IVT-HMB reactions. Yellow triangles indicate recognition of likely irrelevant proteins. A serum dilution of 1:2000 was used for the immunoblots in **(b,c)**.

Supplementary Figure 3 (continued)

MPID-021/E183L/p54 envelope protein (Georgia)

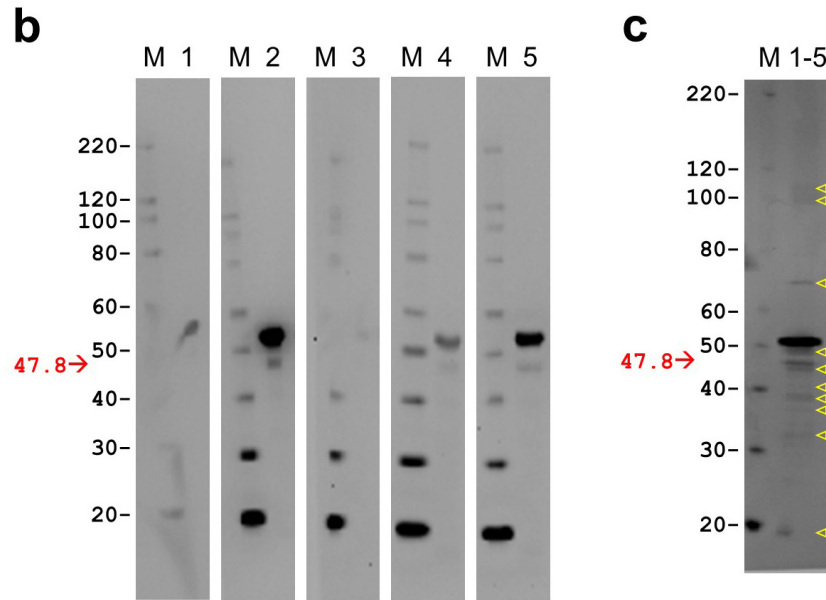

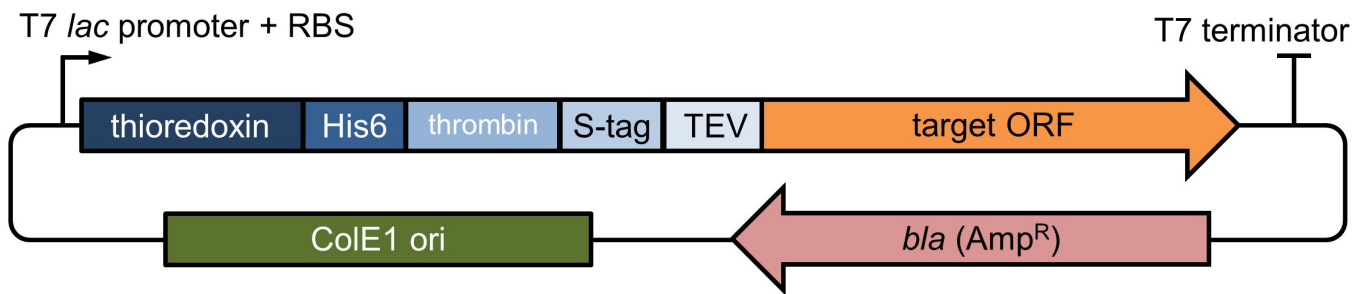

**Supplementary Figure 4. Schematic of pET-32b-TEV.** This vector was used to express full-length target proteins in IVT-HMB. RBS = ribosome binding site; TEV = Tobacco etch virus protease recognition site.

**a**

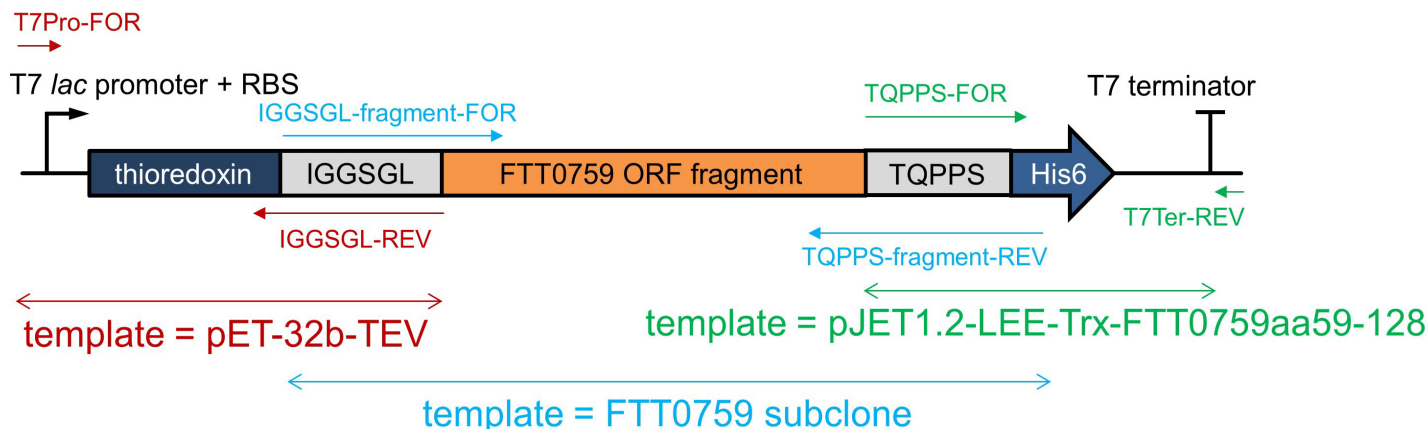

**Supplementary Figure 5. Linear expression elements (LEEs) used to express fragments of target proteins.** (a) General schematic of the LEE<sup>7</sup> DNA constructs for expressing fragments of FTT0759. Colored lines with single and double arrowheads identify the corresponding primers (Supplementary Table 4) and template DNAs (Supplementary Table 2), respectively. RBS = ribosome binding site. Also shown are representative DNA (b) and protein (c) sequences of the LEE construct for the FTT0759 fragment corresponding to amino acids 59-128. (d) General schematic of the LEE DNA constructs for expressing fragments of CD2v. Also shown are representative DNA (e) and protein (f) sequences of the LEE construct for the CD2v fragment corresponding to amino acids 10-202. Colored DNA sequences in (b) and (e) correspond to colored protein sequences in (c) and (f), respectively.

## Supplementary Figure 5 (continued)

**b**

```

LOCUS       LEE\Thio\FTT0759-fragment7-aa59-128             863 bp    DNA    linear    20-FEB-2015
SOURCE
ORGANISM
FEATURES             Location/Qualifiers
     CDS             96..422
                     /vntifkey="4"
                     /label=thioredoxin
     promoter        8..24
                     /vntifkey="30"
                     /label=T7\promoter
     promoter        27..51
                     /vntifkey="30"
                     /label=lacO
     RBS             79..87
                     /vntifkey="32"
                     /label=RBS
     terminator      792..838
                     /vntifkey="43"
                     /label=T7\terminator
     CDS             441..650
                     /vntifkey="4"
                     /label=FTT0759\fragment\aa\59-128
     mutation        452..452
                     /vntifkey="62"
                     /label=modified\codon\usage,\T\to\C
     mutation        449..449
                     /vntifkey="62"
                     /label=modified\codon\usage,\T\to\C
     CDS             96..683
                     /vntifkey="4"
     misc_feature    666..683
                     /label=complete\expressed\protein
                     /vntifkey="21"
                     /label=His6-tag

BASE COUNT      249 a          190 c          196 g          228 t
ORIGIN
1  gcgaaattaa tacgactcac tataggggaa ttgtgagcgg ataacaattc ccctctagaa
61  ataattttgt ttaactttaa gaaggagata tacatatgag cgataaaatt attcacctga
121 ctgacgacag ttttgacacg gatgtactca aagcggacgg gccgatacctc gtogatttct
181 gggcagagtg gtgcggtccg tgcaaaatga tcgccccgat tctggatgaa atcgtctgacg
241 aatatcaggg caaactgacc gttgcaaaac tgaacatcga tcaaaaccct ggcactgccc
301 cgaaatatgg catccgtggt atcccgactc tgctgctggt caaaaacggt gaagtggcgg
361 caaccaaagt gggtgactg tctaaaggtc agttgaaaga gttcctcgac gctaactcgg
421 ccataggcgg aagcggattg aagacattct tcccacggct taatcttaag caatgggcat
481 atgtcatcgc tgtaggattt tttggtgat tttatacaa tataacgttt ctatgggccc
541 aaaaactaat ctccggtaat attgttgcta ttatctatgc ttttactcct tgottaataa
601 caattttatc tagcttatatt tttaatctca aagtaaatca acaagctaaa acccaacctc
661 cctccacca tcatcatcat cattaataaa agggcgaatt ccagcacact gggcgccgtt
721 actagtggat ccggtgcta acaaagcccg aaaggaagct gagttggctg ctgccaccgc
781 tgagcaataa ctaggcataac cccttggggc ctctaaacgg gtcttgaggg gttttttgct
841 gaaaggagga actatatccg gat
//

```

**c**

```

LOCUS       Translation\of\LEE\Thio\FTT0759-fragment7-aa59-128\          196 aa
DEFINITION Translation of a fragment of LEE Thio FTT0759-fragment7-aa59-128.
KEYWORDS    TRANSLATED.
SOURCE
ORGANISM
FEATURES             Location/Qualifiers
     Region          1..109
                     /vntifkey="1000"
                     /label=thioredoxin
     Region          116..185
                     /vntifkey="1000"
                     /label=FTT0759-fragment7-aa59-128
     Site            191..196
                     /vntifkey="264"
                     /label=His6-tag

ORIGIN
1  msdkiihltd dsfdtdvlka dgailvdfwa ewcgpckmia pildeiadey gqkltvakln
61  idqnpqgtapk ygirgiptrl lfkngevaak kvgalskgql kefldanlai gsgglktffp
121 rlnlkqwayv iavgffgvfl ynitflwaek lisgnivaii yaftpceliti lssyifnlkv
181 nqqaktqpps hhhhhh

```

Supplementary Figure 5 (continued)

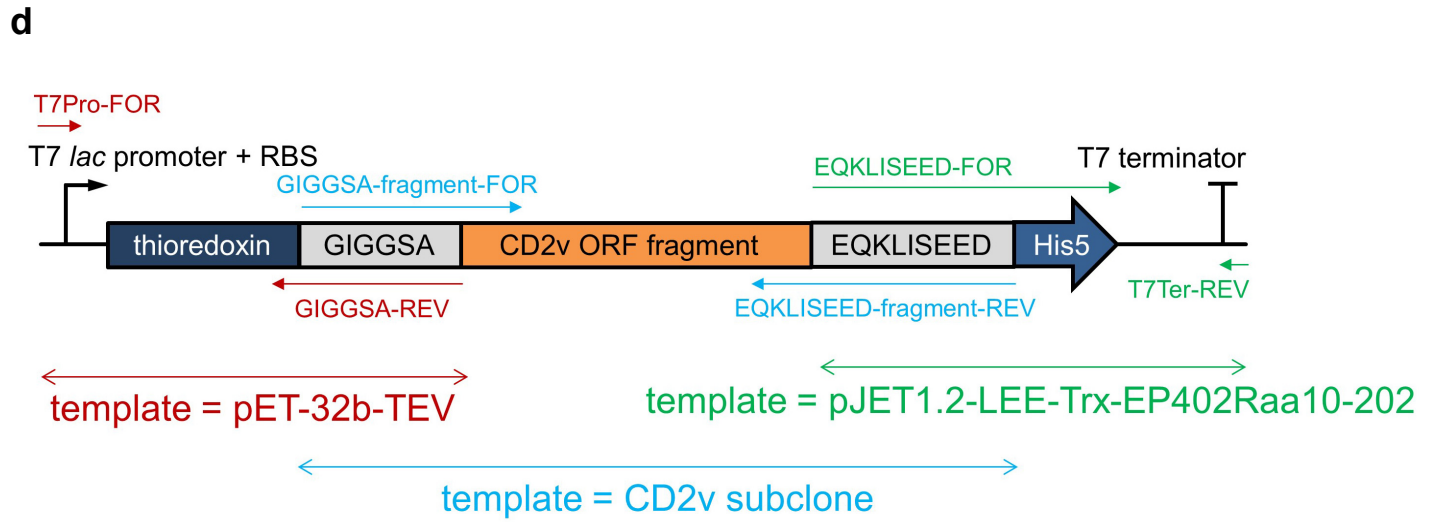

Supplementary Figure 5 (continued)

**e**

```

LOCUS       LEE EP402R_MPID-022_CD2v_aa10-202_Thio          1241 bp    DNA    linear    20-FEB-2015
SOURCE
ORGANISM
FEATURES             Location/Qualifiers
     promoter        8..24
                     /vntifkey="30"
                     /label=T7\promoter
     CDS              96..422
                     /vntifkey="4"
                     /label=thioredoxin
     misc_feature    1047..1061
                     /vntifkey="21"
                     /label=His5-tag
     RBS              79..87
                     /vntifkey="32"
                     /label=RBS
     CDS              441..1019
                     /vntifkey="4"
                     /label=CD2v\fragment\aa\10-202
     terminator      1170..1216
                     /vntifkey="43"
                     /label=T7\terminator
     promoter        27..51
                     /vntifkey="30"
                     /label=lacO
     CDS              96..1061
                     /vntifkey="4"
                     /label=complete\expressed\protein
BASE COUNT    434 a          213 c          227 g          367 t
ORIGIN
1  gcgaaattaa tacgactcac tataggggaa ttgtgagcgg ataacaattc ccctctagaa
61 ataattttgt ttaactttta gaaggagata tacatatgag cgataaaatt atlcacctga
121 ctgacgacag ttttgacacg gatgtactca aagcggacgg ggcgatcctc gtcgatctct
181 gggcagagtg gtgcggctccg tgcaaatga tcgccccgat tctggatgaa atcgctgacg
241 aatatcaggg caaaactgacc gttgcaaac tgaacatcga tcaaaaccct ggcactgocg
301 cgaaatatgg catccgtggt atcccgactc tgctgctggt caaaaacggt gaagtggcgg
361 caaccaaagt gggtgactg tctaaaggtc agttgaaaga gttctctgac gctaactctg
421 ccggtatagg cggaaagcgc tctaacatag ttttaagtat tgattattgg gttagtttta
481 ataaaacaat aattttgatg agtaatat ctaataata taatgatata aatggagtat
541 catggaat ttttaataat tcttttaata cactagctac atgtggaaaa gcaggtaact
601 tttgtgaatg ttctaatat agtacatcaa tatataat aacaaataat tgtagcttaa
661 ctatttttcc tcataatgat gtatttgata caacatatca agtagtatgg aatcaaat
721 ttaattatac aataaaat ttaacacctg ctactcccc aaatatcaca tataattgta
781 ctaatttttt ataaacatgt aaaaaaaaata atggaacaaa cactaatata tatttaata
841 taaatgatac ttttgttaaa tatactaagt aaagtatact tgaatataac tgggaataata
901 gtaacattaa caatttttaca gctacatgta taattaata tacaattagt acatctaattg
961 aaacaacact tataaattgt acttattttaa cattgtcatc taactat tatacttttg
1021 aacagaaact gattagcgaa gaagaccatc atcatcatca ttaataaaag ggcgaattcc
1081 agcacactgg cggccgtttac tagtggatcc ggctgctaac aaagccgaa aggaagctga
1141 gttggctgct gccaccgctg agcaataact agcataaacc cttggggcct ctaaacgggt
1201 cttgaggggt tttttgc ctga aaggaggaac tatatccgga t
//

```

**f**

```

LOCUS       Translation\of\ LEE EP402R_MPID-022_CD2v_aa10-202_Thio          322 aa          20-FEB-2015
DEFINITION Translation of a fragment of LEE EP402R_MPID-022_CD2v_aa10-202_Thio.
KEYWORDS    TRANSLATED.
SOURCE
ORGANISM
FEATURES             Location/Qualifiers
     Region          1..109
                     /vntifkey="1000"
                     /label=thioredoxin
     Region          116..308
                     /vntifkey="1000"
                     /label=CD2v\fragment\aa\10-202
     Site            318..322
                     /vntifkey="264"
                     /label=His5-tag
ORIGIN
1  msdkiihltd dsfdtdvlka dgailvdfwa ewcgpckmia pildeiadey qgkltvakln
61 idqnpgtapk ygirgiprtl lfkngevaak kvgalaskgl kefldanlag iggsasniwl
121 sidyvwfsnk tiildsnitn dnndingvsw nffnnsfntl atcgkagnfc ecsnystsiy
181 nitnncslti fphndvfdtt yqvvwnqiin ytiklltpat ppnitynctn flitckknng
241 tntniylnin dtfvkytnes ileynwnnsn innftatcii nntistsnet tlinctyltl
301 ssnyfytfeg kliseedhhh hh
//

```



## SUPPLEMENTARY TABLES

Supplementary Table 1. Target membrane proteins in this study: immunogenicity, physical characteristics, and role in pathogenesis.

| Source                                | MPID no. <sup>a</sup> | Locus <sup>b</sup> | Accession no. | Protein name <sup>b</sup>                   | Polyclonal antibody by genetic immunization <sup>e</sup> | Reported immunogenicity  | Molecular weight (kDa) | $\beta$ -barrel protein ( $\beta$ ) or no. of $\alpha$ -helical transmembrane domains ( $\alpha$ ) <sup>r</sup> | Hydrophobicity <sup>s</sup> | Putative membrane localization <sup>t</sup> | Reported role in pathogenesis |
|---------------------------------------|-----------------------|--------------------|---------------|---------------------------------------------|----------------------------------------------------------|--------------------------|------------------------|-----------------------------------------------------------------------------------------------------------------|-----------------------------|---------------------------------------------|-------------------------------|
| <i>Francisella tularensis</i> SCHU S4 | 024                   | FTT1156            | YP_170123     | PilQ                                        | +                                                        | <sup>f,g</sup>           | 65                     | $\beta$                                                                                                         | 36%                         | OM                                          |                               |
|                                       | 025                   | FTT1258            | YP_170216     | OMEP, outer membrane efflux protein         | +                                                        | <sup>f</sup>             | 55                     | $\beta$                                                                                                         | 37%                         | OM                                          |                               |
|                                       | 026                   | FTT1573            | YP_170495     | BamA/YaeT                                   | +                                                        | <sup>f</sup>             | 88                     | $\beta$                                                                                                         | 35%                         | OM                                          |                               |
|                                       | 027                   | FTT1724            | YP_170626     | ToIC                                        | +                                                        | <sup>f,h</sup>           | 57                     | $\beta$                                                                                                         | 36%                         | OM                                          | <sup>v</sup>                  |
|                                       | 028                   | FTT0583            | YP_169607     | FopA                                        | +                                                        | <sup>f,g,h,i,j,k,l</sup> | 42                     | $\beta$                                                                                                         | 34%                         | OM                                          | <sup>w,x,y,z</sup>            |
|                                       | 029                   | FTT0918            | YP_169915     | FupA <sup>c</sup>                           | $\pm$                                                    | <sup>f,i,m,n</sup>       | 59                     | $\beta$                                                                                                         | 35%                         | OM lipo <sup>u</sup>                        | <sup>w,aa</sup>               |
|                                       | 030                   | FTT0919            | YP_169916     | FupB <sup>c</sup>                           | -                                                        | <sup>f</sup>             | 53                     | $\beta$                                                                                                         | 38%                         | OM                                          |                               |
|                                       | 032                   | FTT0759            | YP_169769     | hypothetical                                | -                                                        |                          | 34                     | 9-10 $\alpha$                                                                                                   | 54%                         | IM                                          | <sup>w</sup>                  |
|                                       | 033                   | FTT1416            | YP_170359     | Flpp3 lipoprotein <sup>c</sup>              | +                                                        | <sup>h</sup>             | 15                     | 0-1 $\alpha$                                                                                                    | 31%                         | OM lipo                                     | <sup>w</sup>                  |
|                                       | 034                   | FTT1525            | YP_170455     | Hypothetical                                | +                                                        |                          | 33                     | 2 $\alpha$                                                                                                      | 38%                         | IM                                          | <sup>w</sup>                  |
|                                       | 035                   | FTT0807            | YP_169814     | CapA <sup>c</sup>                           | $\pm$                                                    |                          | 44                     | 2 $\alpha$                                                                                                      | 36%                         | IM                                          | <sup>w,bb</sup>               |
|                                       | 036                   | FTT0805            | YP_169812     | CapB                                        | $\pm$                                                    |                          | 45                     | 1 $\alpha$                                                                                                      | 38%                         | IM                                          | <sup>w,cc</sup>               |
|                                       | 037                   | FTT0806            | YP_169813     | CapC                                        | -                                                        |                          | 17                     | 4-5 $\alpha$                                                                                                    | 53%                         | IM                                          | <sup>w,bb</sup>               |
| 051                                   | FTT1406               | YP_170350          | hypothetical  | +                                           | <sup>h</sup>                                             | 44                       | 2-3 $\alpha$           | 45%                                                                                                             | IM                          |                                             |                               |
| African swine fever virus             | 021                   | E183L              | Q89784        | p54 envelope protein (Malawi) <sup>d</sup>  | $\pm$                                                    | <sup>o</sup>             | 19                     | 1 $\alpha$                                                                                                      | 33%                         | IE                                          | <sup>dd</sup>                 |
|                                       | 021                   | E183L              | CAQ53724      | p54 envelope protein (Georgia) <sup>d</sup> | +                                                        | <sup>o</sup>             | 19                     | 1 $\alpha$                                                                                                      | 33%                         | IE                                          | <sup>dd</sup>                 |
|                                       | 022                   | EP402R             | CBW46724      | CD2v (Georgia) <sup>d</sup>                 | -                                                        | <sup>p</sup>             | 41                     | 3-4 $\alpha$                                                                                                    | 31%                         | OE                                          | <sup>ee</sup>                 |
|                                       | 023                   | EP153R             | CBW46723      | C-type lectin-like (Georgia) <sup>d</sup>   | -                                                        | <sup>q</sup>             | 18                     | 1 $\alpha$                                                                                                      | 30%                         | ER                                          | <sup>ff</sup>                 |

**Supplementary Table 1 (continued)**

- <sup>a</sup> MPID number designation is according to the Protein Structure Initiative<sup>10</sup>.
- <sup>b</sup> FTT numbers and protein names are from<sup>11</sup>.
- <sup>c</sup> FupA, FupB protein designations are from<sup>12</sup>, Flpp3 is from<sup>13</sup>, and CapA is from<sup>14</sup>.
- <sup>d</sup> Malawi is the ASFV Malawi Lil 20/1 isolate<sup>15</sup>, and Georgia is the ASFV Georgia 2007/1 isolate<sup>16</sup>. p54 (Malawi) and p54 (Georgia) have 87% identity.
- <sup>e</sup> This work. Polyclonal antibodies were produced by genetic immunization and were scored as follows: +, positive immunoblot obtained for 5 out of 5 mice at  $\geq 1:500$  dilution;  $\pm$ , positive immunoblot obtained for less than 5 out of 5 mice or at  $\leq 1:500$  dilution; -, no reactivity by immunoblot.
- <sup>f</sup> Polyclonal antibodies were generated in rats injected with purified denatured recombinant protein<sup>17</sup>.
- <sup>g</sup> The target protein was identified by mass spectrometry of a membrane-enriched protein fraction from the *F. tularensis* live vaccine strain (LVS) run on 2D-PAGE, upon probing with sera from mice immunized with *F. tularensis* LVS<sup>18</sup>.
- <sup>h</sup> Proteome microarray signal suggested the presence of target-specific antibody in sera of mice immunized with killed *F. tularensis* LVS<sup>19</sup>.
- <sup>i</sup> Protein was identified in immunoblots of 2D-PAGE containing total protein from *F. tularensis* strain FSC033, using sera of mice immunized with *F. tularensis* LVS and subsequently challenged with *F. tularensis* FSC033<sup>20</sup>.
- <sup>j</sup> Protein was identified by mass spectrometry of a membrane-enriched protein fraction from *F. tularensis* LVS run on 2D-PAGE, upon probing with sera from patients diagnosed with tularemia<sup>21</sup>.
- <sup>k</sup> Two-dimensional gel electrophoresis, immunoblotting, and mass spectrometry analyses revealed an antibody response to this protein in mice experimentally infected with *F. tularensis* LVS, and in human patients diagnosed with tularemia, but not in control sera from mice or humans<sup>22</sup>.
- <sup>l</sup> Monoclonal antibodies against FopA were isolated following sublethal infection with *F. tularensis* LVS plus boosting with sonicated bacteria<sup>23</sup>.
- <sup>m</sup> Protein was identified in immunoblots using sera from a lab assistant who was accidentally infected with *F. tularensis* SCHU S4<sup>24</sup>.
- <sup>n</sup> Polyclonal antibodies were raised upon immunization of guinea pigs with a recombinantly-expressed, GST-tagged fragment (amino acids 25-176) of FupA<sup>12</sup>.
- <sup>o</sup> Western analyses with sera from convalescent pigs indicate that p54 is one of the most highly antigenic proteins in the ASFV proteome<sup>25,26</sup>.
- <sup>p</sup> Evidence for immunogenicity of the post-translationally modified (glycosylated) CD2v is a ~75 kDa band that was detected in immunoblots of protein from baculovirus-infected Sf cells expressing CD2v from ASFV isolate E75CV<sub>1</sub> using pig sera following infection with ASFV strain 1207VR11<sup>27</sup>. A similarly-sized band was also detected in protein from extracellular particles of ASFV strain BA71V that were isolated from an infected Vero cell line, using pig sera following immunizations with CD2v-expressing baculovirus-infected Sf cells<sup>27</sup>. Host glycosylation of CD2v effectively doubles this protein's apparent molecular weight<sup>28</sup>.
- <sup>q</sup> Rabbit serum with low reactivity (1:100 serum dilution) was reported following peptide immunization<sup>29</sup>.
- <sup>r</sup> Shown are the number of  $\alpha$ -helical transmembrane domains as predicted using the programs TopPred<sup>30</sup>, TMHMM<sup>31</sup>, SOSUI<sup>32</sup>, and TMpred<sup>33</sup>.
- <sup>s</sup> Percentage total by weight of amino acid residues A, F, I, L, V, and W.
- <sup>t</sup> Putative localization to the outer membrane (OM) or inner membrane (IM) is based on protein designations<sup>11</sup>, predicted transmembrane domains (this work), and/or physical determinations<sup>17,34</sup>. Localization of lipoproteins (lipo) to the inner or outer membrane is predicted by the second amino acid

following the lipidation site, as has been characterized in *E. coli*<sup>35</sup>. p54 localizes to the inner envelope (IE) of ASFV<sup>36</sup>; CD2v to the outer envelope (OE) of ASFV<sup>37</sup>; and the C-type lectin to the endoplasmic reticulum (ER) of an infected cell line<sup>38</sup>.

<sup>u</sup> Lipoprotein designation was predicted by <sup>17,39,40</sup>.

<sup>v</sup> Deletion of *tolC* in *F. tularensis* LVS caused significant attenuation of virulence in a mouse model<sup>41</sup> and led to increased secretion of proinflammatory cytokines. TolC delays activation of the intrinsic apoptotic pathway during infection of primary macrophages and during organ colonization in a mouse model<sup>42</sup>.

<sup>w</sup> The target protein was indicated as a virulence determinant in *F. tularensis* LVS by signature-tagged mutagenesis and subsequent infection of a mouse model<sup>43</sup>.

<sup>x</sup> Passive transfer of anti-FopA antibodies allowed 40% survival of mice infected with *F. tularensis* LVS<sup>23</sup>.

<sup>y</sup> FopA-specific antibodies protected against lethal intradermal and intranasal challenges with *F. tularensis* LVS but not *F. tularensis* SCHU S4<sup>44</sup>.

<sup>z</sup> Msutagenesis of FopA in *Francisella novicida* strain U112<sup>45</sup> and in *F. tularensis* strain SCHU S4<sup>46</sup> led to attenuated growth in macrophages.

<sup>aa</sup> Mutation of *fupA* attenuated mouse infection by *F. tularensis* SCHU S4<sup>12</sup>. FupA is also required for high-affinity ferrous iron uptake<sup>12</sup>.

<sup>bb</sup> In a whole-genome screen of *F. novicida* strain U112, mutation of *capA* or *capC* led to loss of colonization of the spleen in an inhalation mouse model<sup>47</sup>.

<sup>cc</sup> Deletion of *capB* significantly attenuated infection in either *F. tularensis* SCHU S4<sup>48</sup> or *F. tularensis* LVS<sup>49</sup>.

<sup>dd</sup> p54 mediates specific binding to macrophages<sup>50</sup>, recruitment of the endoplasmic reticulum membrane<sup>36,51</sup>, and binding to dynein, the light chain of the microtubule motor protein<sup>52,53</sup>.

<sup>ee</sup> CD2v has roles in hemadsorption<sup>54,55</sup> and immunosuppression<sup>56</sup>.

<sup>ff</sup> The C-type lectin is implicated in anti-apoptosis<sup>57</sup>, hemadsorption<sup>29</sup>, and interaction with the host MHC I<sup>38</sup>.

Supplementary Table 2. Plasmid vectors used in this study.

| Plasmid name                                      | DNASU Plasmid ID <sup>58</sup> | Usage                                            | Reference  |
|---------------------------------------------------|--------------------------------|--------------------------------------------------|------------|
| <i>Empty parent vectors</i>                       |                                |                                                  |            |
| pCMVi-LSrCOMPTT                                   | EvNO00629005                   | Genetic immunization                             | This study |
| pCMVi-UB                                          | EvNO00629006                   | Genetic immunization                             | 59         |
| pCMVi-LS                                          | EvNO00631283                   | Genetic immunization                             | 59         |
| pRSET-natGFP                                      | EvNO00623703                   | GFP-tagged expression                            | 14         |
| pRSET-natGFPHis                                   | EvNO00623704                   | GFP-His-tagged expression                        | 14         |
| pET-32b-TEV                                       | EvNO00629003                   | Thioredoxin-tagged expression                    | This study |
| pCDF-BAD                                          | EvNO00631285                   | Arabinose-inducible expression in <i>E. coli</i> | This study |
| <i>Accessory vectors for genetic immunization</i> |                                |                                                  |            |
| pCMVi-LS-LTA-R192G                                | EcCD00697199                   | DNA adjuvant for genetic immunization            | 60         |
| pCMVi-LS-LTB                                      | EcCD00697200                   | DNA adjuvant for genetic immunization            | 60         |
| <i>Subclones</i>                                  |                                |                                                  |            |
| FTT0583 in pCMVi-LSrCOMPTT                        | FtCD00665310                   | Genetic immunization                             | This study |
| FTT0759 in pCMVi-LSrCOMPTT                        | FtCD00665313                   | Genetic immunization                             | This study |
| FTT0805 in pCMVi-LSrCOMPTT                        | FtCD00665317                   | Genetic immunization                             | This study |
| FTT0806 in pCMVi-LSrCOMPTT                        | FtCD00665321                   | Genetic immunization                             | This study |
| FTT0807 in pCMVi-LSrCOMPTT                        | FtCD00665324                   | Genetic immunization                             | This study |
| FTT0918 in pCMVi-LSrCOMPTT                        | FtCD00696809                   | Genetic immunization                             | This study |
| FTT0919 in pCMVi-LSrCOMPTT                        | FtCD00665293                   | Genetic immunization                             | This study |
| FTT1156 in pCMVi-LSrCOMPTT                        | FtCD00696813                   | Genetic immunization                             | This study |
| FTT1258 in pCMVi-LSrCOMPTT                        | FtCD00665297                   | Genetic immunization                             | This study |
| FTT1406 in pCMVi-LSrCOMPTT                        | FtCD00696704                   | Genetic immunization                             | This study |
| FTT1416 in pCMVi-LSrCOMPTT                        | FtCD00665299                   | Genetic immunization                             | This study |
| FTT1525 in pCMVi-LSrCOMPTT                        | FtCD00665303                   | Genetic immunization                             | This study |
| FTT1573 in pCMVi-LSrCOMPTT                        | FtCD00696814                   | Genetic immunization                             | This study |
| FTT1724 in pCMVi-LSrCOMPTT                        | FtCD00697212                   | Genetic immunization                             | This study |
| E183L in pCMVi-LSrCOMPTT                          | AsCD00665311                   | Genetic immunization                             | This study |
| EP153R in pCMVi-LSrCOMPTT                         | AsCD00665318                   | Genetic immunization                             | This study |
| EP402R in pCMVi-LSrCOMPTT                         | AsCD00665314                   | Genetic immunization                             | This study |
| EP402R in pCMVi-LS                                | AsCD00665308                   | Genetic immunization                             | This study |
| FTT0759 in pCMVi-UB                               | FtCD00670281                   | Genetic immunization                             | This study |
| FTT0805 in pCMVi-UB                               | FtCD00670287                   | Genetic immunization                             | This study |
| FTT0806 in pCMVi-UB                               | FtCD00670290                   | Genetic immunization                             | This study |
| FTT0807 in pCMVi-UB                               | FtCD00670293                   | Genetic immunization                             | This study |
| FTT0918 in pCMVi-UB                               | FtCD00696802                   | Genetic immunization                             | This study |
| FTT0919 in pCMVi-UB                               | FtCD00696804                   | Genetic immunization                             | This study |
| E183L in pCMVi-UB                                 | AsCD00670301                   | Genetic immunization                             | This study |
| EP153R in pCMVi-UB                                | AsCD00670311                   | Genetic immunization                             | This study |
| EP402R in pCMVi-UB                                | AsCD00670306                   | Genetic immunization                             | This study |
| FTT0583 in pET-32b-TEV                            | FtCD00696807                   | Thioredoxin-tagged expression                    | This study |
| FTT0759 in pET-32b-TEV                            | FtCD00697211                   | Thioredoxin-tagged expression                    | This study |

## Supplementary Information, Hansen *et al.*, Polyclonal Antibody Production for Membrane Proteins

|                               |              |                                                     |            |
|-------------------------------|--------------|-----------------------------------------------------|------------|
| FTT0805 in pET-32b-TEV        | FtCD00696798 | Thioredoxin-tagged expression                       | This study |
| FTT0806 in pET-32b-TEV        | FtCD00670280 | Thioredoxin-tagged expression                       | This study |
| FTT0807 in pET-32b-TEV        | FtCD00670285 | Thioredoxin-tagged expression                       | This study |
| FTT0918 in pET-32b-TEV        | FtCD00696799 | Thioredoxin-tagged expression                       | This study |
| FTT0919 in pET-32b-TEV        | FtCD00696800 | Thioredoxin-tagged expression                       | This study |
| FTT1156 in pET-32b-TEV        | FtCD00696801 | Thioredoxin-tagged expression                       | This study |
| FTT1258 in pET-32b-TEV        | FtCD00696803 | Thioredoxin-tagged expression                       | This study |
| FTT1406 in pET-32b-TEV        | FtCD00670299 | Thioredoxin-tagged expression                       | This study |
| FTT1416 in pET-32b-TEV        | FtCD00670304 | Thioredoxin-tagged expression                       | This study |
| FTT1525 in pET-32b-TEV        | FtCD00696806 | Thioredoxin-tagged expression                       | This study |
| FTT1573 in pET-32b-TEV        | FtCD00696808 | Thioredoxin-tagged expression                       | This study |
| FTT1724 in pET-32b-TEV        | FtCD00670317 | Thioredoxin-tagged expression                       | This study |
| E183L in pET-32b-TEV          | AsCD00696703 | Thioredoxin-tagged expression                       | This study |
| EP153R in pET-32b-TEV         | AsCD00670286 | Thioredoxin-tagged expression                       | This study |
| EP402R in pET-32b-TEV         | AsCD00697195 | Thioredoxin-tagged expression                       | This study |
| FTT0583 in pRSET-natGFP       | FtCD00697197 | GFP-tagged expression                               | This study |
| FTT0759 in pRSET-natGFP       | FtCD00670296 | GFP-tagged expression                               | This study |
| FTT0805 in pRSET-natGFP       | FtCD00696717 | GFP-tagged expression                               | This study |
| FTT0806 in pRSET-natGFP       | FtCD00670303 | GFP-tagged expression                               | This study |
| FTT0807 in pRSET-natGFP       | FtCD00670309 | GFP-tagged expression                               | This study |
| FTT0918 in pRSET-natGFP       | FtCD00696720 | GFP-tagged expression                               | This study |
| FTT0919 in pRSET-natGFP       | FtCD00670316 | GFP-tagged expression                               | This study |
| FTT1156 in pRSET-natGFP       | FtCD00696702 | GFP-tagged expression                               | This study |
| FTT1258 in pRSET-natGFP       | FtCD00670279 | GFP-tagged expression                               | This study |
| FTT1406 in pRSET-natGFP       | FtCD00670284 | GFP-tagged expression                               | This study |
| FTT1416 in pRSET-natGFP       | FtCD00670288 | GFP-tagged expression                               | This study |
| FTT1525 in pRSET-natGFP       | FtCD00670292 | GFP-tagged expression                               | This study |
| FTT1573 in pRSET-natGFP       | FtCD00696713 | GFP-tagged expression                               | This study |
| FTT1724 in pRSET-natGFP       | FtCD00670297 | GFP-tagged expression                               | This study |
| E183L in pRSET-natGFPHis      | AsCD00670283 | GFP-His-tagged expression                           | This study |
| E183L in pRSET-natGFP         | AsCD00670298 | GFP-tagged expression                               | This study |
| EP153R in pRSET-natGFP        | AsCD00670310 | GFP-tagged expression                               | This study |
| EP402R in pRSET-natGFP        | AsCD00697198 | GFP-tagged expression                               | This study |
| pJET-LEE-Thio-FTT0759aa59-128 | FtCD00697194 | PCR template for generation of LEE DNA              | This study |
| pJET-LEE-Thio-EP402Raa10-202  | AsCD00697924 | PCR template for generation of LEE DNA              | This study |
| pRSET-FTT0583                 | FtCD00665298 | Expression of the tag-free target in <i>E. coli</i> | This study |
| pRSET-FTT1156                 | FtCD00665309 | Expression of the tag-free target in <i>E. coli</i> | This study |
| pRSET-FTT1258                 | FtCD00665312 | Expression of the tag-free target in <i>E. coli</i> | This study |
| pRSET-FTT1525                 | FtCD00665315 | Expression of the tag-free target in <i>E. coli</i> | This study |
| pCDF-BAD-EcBamA-FTT1573       | FtCD00696810 | Expression of the tag-free target in <i>E. coli</i> | This study |

**Supplementary Table 3. Representative oligonucleotide primers used to generate subclones.**

| Subclone name              | Forward and reverse primer sequences (5' to 3') <sup>a</sup>                                                               |
|----------------------------|----------------------------------------------------------------------------------------------------------------------------|
| pCDF-BAD-EcBamA-FTT1573    | <u>AAGGAGATATACATATGGCGATGAAAAAGTTGCTCATAG</u><br><u>GCGCCCTCGAGCATA</u> <b>CTA</b> TTAGAAATTTTGTCTAATGAGAATTG             |
| pRSET-FTT1156 (tagless)    | <u>GAAGGAGATATACATATGTTTTTGCAAAAAGAAGTTATTAGTTGTTT</u><br><u>CGGAACCTGCTGATCC</u> <b>TCA</b> TTTTTGGACTCTTGACTCAATGATTTTTG |
| FTT1156 in pCMVi-LSrCOMPTT | <u>GGTAGCGGAGATCTGATGTTTTTGCAAAAAGAAGTTATTAGTTGTTT</u><br><u>GCCATGCAAGCTTAT</u> <b>TCA</b> TTTTTGGACTCTTGACTCAATGATTTTTG  |
| E183L in pCMVi-UB          | <u>CGCCTGAGAGGTGCAATGGATTCTGAATTTTTTCAACCGGTTTATC</u><br><u>ATGCCACCCGGGATC</u> <b>CTA</b> CAAGGAGTTTTCTAGGTCTTTATGC       |
| FTT1156 in pET-32b-TEV     | <u>GCGATATCGGATCCGATGTTTTTGCAAAAAGAAGTTATTAGTTGTTT</u><br><u>CGGCCGCAAGCTT</u> <b>TCA</b> TTTTTGGACTCTTGACTCAATGATTTTTG    |
| FTT1156 in pRSET-natGFP    | <u>GAAGGAGATATACATATGTTTTTGCAAAAAGAAGTTATTAGTTGTTT</u><br><u>CGGAACCTGCTGATCC</u> <b>TCA</b> TTTTTGGACTCTTGACTCAATGATTTTTG |

<sup>a</sup> Primers were designed for ligation-independent cloning as described in the Methods. Underlined sequence corresponds to the parent vector, italicized sequence corresponds to the membrane protein, and bold sequence indicates a stop codon.

Supplementary Table 4. Oligonucleotide primers used for construction of LEEs.

| Primer name <sup>a</sup>                   | Sequence (5' to 3') <sup>b</sup>                                          |
|--------------------------------------------|---------------------------------------------------------------------------|
| Primers for LEE fragments flanking the ORF |                                                                           |
| <b>T7Pro-FOR</b>                           | <u>GCGAAATTAATACGACTCACTATAGG</u>                                         |
| <b>GIGGSA-REV</b>                          | <u>GGCGCTTCCGCCTATACCGCCAGGTTAGCGTCGAGG</u>                               |
| <b>IGGSSL-REV</b>                          | <u>CAATCCGCTTCCGCCTAT</u>                                                 |
| <b>T7Ter-REV</b>                           | <u>ATCCGGATATAGTTCCTCCTTTTTCAG</u>                                        |
| <b>EQKLISEED-FOR</b>                       | <u>GAACAGAAACTGATTAGCGAAGAAGACCATCATCATCATCATTAATAAAAGGGCG</u>            |
| <b>TQPPS-FOR</b>                           | <u>ACCCAACCTCCCTCCAC</u>                                                  |
| <b>IGGSSL-fragment-FOR primers</b>         |                                                                           |
| FTT0759aa1F                                | <u>ATAGGCGGAAGCGGATTGATGAACTCTTCATTAACAAAAGGCTACG</u>                     |
| FTT0759aa149F                              | <u>ATAGGCGGAAGCGGATTGGCGGAATGCTTAAATGGTGTTCAG</u>                         |
| FTT0759aa59F                               | <u>ATAGGCGGAAGCGGATTGAAGACATTC*<i>TTC</i>*CCACGGCTTAATC</u> <sup>c</sup>  |
| FTT0759aa179F                              | <u>ATAGGCGGAAGCGGATTGAAGTGTGTGTAGAGAAGGTGTAC</u>                          |
| FTT0759aa120F                              | <u>ATAGGCGGAAGCGGATTGAATCTCAAAGTAAATCAACAAGCTAAAATTGG</u>                 |
| <b>TQPPS-fragment-REV primers</b>          |                                                                           |
| FTT0759aa158R                              | <u>GGAGGGAGGTTGGGTGTTAATCTGAACACCATTTAAGCATTCC</u>                        |
| FTT0759aa305R                              | <u>GGAGGGAGGTTGGGTATTGCCAGACTTACGATTAAGTGCAG</u>                          |
| FTT0759aa250R                              | <u>GGAGGGAGGTTGGGTACCTATTTCTTCAAGAGCTCCTAAATAC</u>                        |
| FTT0759aa220R                              | <u>GGAGGGAGGTTGGGTATCGGTATATGCTAACTGAGAAAAATCAG</u>                       |
| FTT0759aa128R                              | <u>GGAGGGAGGTTGGGTTTTAGCTTGTGATTTACTTTGAGATTAATAATATAG</u>                |
| FTT0759aa192R                              | <u>GGAGGGAGGTTGGGTATTTATTGTGATCATGTGTACACCTTCTC</u>                       |
| <b>GIGGSA-fragment-FOR primers</b>         |                                                                           |
| CD2vaa10F                                  | <u>GGTATAGGCGGAAGCGCCCTAACATAGTTTTAAGTATTGATTATTGGGTTAG</u>               |
| CD2vaa170F                                 | <u>GGTATAGGCGGAAGCGCCGCTACATGTATAATTAATAATACAATTAGTACATC</u>              |
| <b>EQKLISEED-fragment-REV primers</b>      |                                                                           |
| CD2vaa202R                                 | <u>GTCTTCTTCGCTAATCAGTTTCTGTTCAAAAGTATAAAAAATAGTTAGATGACAATGTTAAATAAG</u> |
| CD2vaa355R                                 | <u>GTCTTCTTCGCTAATCAGTTTCTGTTCGTGAATAAGCGAAATATTTGGGTAGATAATG</u>         |

<sup>a</sup> Coloring corresponds to that used in Supplementary Fig. 5a,d. The underlined protein sequences in the left column of the table correspond to the underlined primer sequences in the right column of the table.

<sup>b</sup> Italicized sequences correspond to FTT0759 or CD2v.

<sup>c</sup> "C\*" indicates modification from a T nucleotide in order to adjust the T<sub>m</sub> of the primer. The protein sequence was not affected.

## SUPPLEMENTARY REFERENCES

1. Pawlita, M., Mushinski, E., Feldmann, R. J. & Potter, M. A monoclonal antibody that defines an idiotope with two subsites in galactan-binding myeloma proteins. *J. Exp. Med.* **154**, 1946-1956 (1981).
2. Kawashima, I. *et al.* Mouse monoclonal antibodies detecting disialogangliosides on mouse and human T lymphomas. *Int. J. Cancer* **41**, 267-274 (1988).
3. Vieira, J. G., Federico, P., Matsueda, G. & Neer, R. M. Monoclonal antibodies to bovine parathyroid hormone: production and characterization. *Braz. J. Med. Biol. Res.* **21**, 1005-1011 (1988).
4. Bennick, A., Grøn, B. & Brosstad, F. Hybridomas can successfully be prepared from frozen/thawed spleen cells. *Hybridoma* **10**, 761-765 (1991).
5. Marusich, M. F. Efficient hybridoma production using previously frozen splenocytes. *J. Immunol. Methods* **114**, 155-159 (1988).
6. Poonam, M. & Butchiah, G. Production of hybridoma cell lines secreting antibodies to bovine herpesvirus-1 using previously frozen splenocytes. *J. Appl. Anim. Res.* **14**, 65-73 (1998).
7. Sykes, K. F. & Johnston, S. A. Linear expression elements: a rapid, *in vivo*, method to screen for gene functions. *Nat. Biotechnol.* **17**, 355-359 (1999).
8. Rath, A., Glibowicka, M., Nadeau, V. G., Chen, G. & Deber, C. M. Detergent binding explains anomalous SDS-PAGE migration of membrane proteins. *Proc. Natl. Acad. Sci. U.S.A.* **106**, 1760-1765 (2009).
9. Leo, J. C., Oberhettinger, P. & Linke, D. Assessing the outer membrane insertion and folding of multimeric transmembrane  $\beta$ -barrel proteins. *Methods Mol. Biol.* **1329**, 157-167 (2015).
10. Gifford, L. K., Carter, L. G., Gabanyi, M. J., Berman, H. M. & Adams, P. D. The Protein Structure Initiative Structural Biology Knowledgebase Technology Portal: a structural biology web resource. *J. Struct. Funct. Genomics* **13**, 57-62 (2012).
11. Larsson, P. *et al.* The complete genome sequence of *Francisella tularensis*, the causative agent of tularemia. *Nat. Genet.* **37**, 153-159 (2005).
12. Ramakrishnan, G., Sen, B. & Johnson, R. Paralogous outer membrane proteins mediate uptake of different forms of iron and synergistically govern virulence in *Francisella tularensis tularensis*. *J. Biol. Chem.* **287**, 25191-25202 (2012).
13. Parra, M. C. *et al.* Identification, cloning, expression, and purification of *Francisella* lpp3: an immunogenic lipoprotein. *Microbiol. Res.* **165**, 531-545 (2010).
14. Martin-Garcia, J. M. *et al.* Purification and biophysical characterization of the CapA membrane protein FTT0807 from *Francisella tularensis*. *Biochemistry* **53**, 1958-1970 (2014).
15. Dixon, L. K. Molecular cloning and restriction enzyme mapping of an African swine fever virus isolate from Malawi. *J. Gen. Virol.* **69**, 1683-1694 (1988).
16. Rowlands, R. J. *et al.* African swine fever virus isolate, Georgia, 2007. *Emerg. Infect. Dis.* **14**, 1870-1874 (2008).
17. Huntley, J. F., Conley, P. G., Hagman, K. E. & Norgard, M. V. Characterization of *Francisella tularensis* outer membrane proteins. *J. Bacteriol.* **189**, 561-574 (2007).
18. Twine, S. M., Petit, M. D., Fulton, K. M., House, R. V. & Conlan, J. W. Immunoproteomics analysis of the murine antibody response to vaccination with an improved *Francisella tularensis* live vaccine strain (LVS). *PLoS One* **5**, e10000 (2010).
19. Eyles, J. E. *et al.* Immunodominant *Francisella tularensis* antigens identified using proteome microarray. *Proteomics* **7**, 2172-2183 (2007).
20. Twine, S. M. *et al.* Immunoproteomic analysis of the murine antibody response to successful and failed immunization with live anti-*Francisella* vaccines. *Biochem. Biophys. Res. Commun.* **346**, 999-1008 (2006).
21. Janovská, S. *et al.* Identification of immunoreactive antigens in membrane proteins enriched fraction from *Francisella tularensis* LVS. *Immunol. Lett.* **108**, 151-159 (2007).
22. Havlasová, J. *et al.* Proteomic analysis of anti-*Francisella tularensis* LVS antibody response in murine model of tularemia. *Proteomics* **5**, 2090-2103 (2005).



23. Savitt, A. G., Mena-Taboada, P., Monsalve, G. & Benach, J. L. *Francisella tularensis* infection-derived monoclonal antibodies provide detection, protection, and therapy. *Clin. Vaccine Immunol.* **16**, 414-422 (2009).
24. Janovská, S. *et al.* Proteomic analysis of antibody response in a case of laboratory-acquired infection with *Francisella tularensis* subsp. *tularensis*. *Folia Microbiol. (Praha)* **52**, 194-198 (2007).
25. Alcaraz, C. *et al.* Highly specific confirmatory Western blot test for African swine fever virus antibody detection using the recombinant virus protein p54. *J. Virol. Methods* **52**, 111-119 (1995).
26. Gómez-Puertas, P. *et al.* Neutralizing antibodies to different proteins of African swine fever virus inhibit both virus attachment and internalization. *J. Virol.* **70**, 5689-5694 (1996).
27. Ruiz-Gonzalvo, F., Rodríguez, F. & Escribano, J. M. Functional and immunological properties of the baculovirus-expressed hemagglutinin of African swine fever virus. *Virology* **218**, 285-289 (1996).
28. Goatley, L. C. & Dixon, L. K. Processing and localization of the African swine fever virus CD2v transmembrane protein. *J. Virol.* **85**, 3294-3305 (2011).
29. Galindo, I., Almazán, F., Bustos, M. J., Viñuela, E. & Carrascosa, A. L. African swine fever virus EP153R open reading frame encodes a glycoprotein involved in the hemadsorption of infected cells. *Virology* **266**, 340-351 (2000).
30. Claros, M. G. & von Heijne, G. TopPred II: an improved software for membrane protein structure predictions. *Comput. Appl. Biosci.* **10**, 685-686 (1994).
31. Sonnhammer, E. L., von Heijne, G. & Krogh, A. A hidden Markov model for predicting transmembrane helices in protein sequences. *Proc. Int. Conf. Intell. Syst. Mol. Biol.* **6**, 175-182 (1998).
32. Hirokawa, T., Boon-Chieng, S. & Mitaku, S. SOSUI: classification and secondary structure prediction system for membrane proteins. *Bioinformatics* **14**, 378-379 (1998).
33. Hofmann, K. & Stoffel, W. TMbase - a database of membrane spanning proteins segments. *Biol. Chem. Hoppe Seyler* **347**, 166 (1993).
34. Dresler, J., Klimentova, J. & Stulik, J. *Francisella tularensis* membrane complexome by blue native/SDS-PAGE. *J. Proteomics* **75**, 257-269 (2011).
35. Masuda, K., Matsuyama, S. & Tokuda, H. Elucidation of the function of lipoprotein-sorting signals that determine membrane localization. *Proc. Natl. Acad. Sci. U.S.A.* **99**, 7390-7395 (2002).
36. Rodríguez, J. M., García-Escudero, R., Salas, M. L. & Andrés, G. African swine fever virus structural protein p54 is essential for the recruitment of envelope precursors to assembly sites. *J. Virol.* **78**, 4299-1313 (2004).
37. Dixon, L. K. *et al.* in *Virus Taxonomy: Classification and Nomenclature of Viruses: Ninth Report of the International Committee on Taxonomy of Viruses*. (Eds. King, A. M. Q., Adams, M. J., Carstens, E. B. & Lefkowitz, E. J.) 153-162 (Elsevier/Academic Press, Amsterdam; 2012).
38. Hurtado, C. *et al.* The African swine fever virus lectin EP153R modulates the surface membrane expression of MHC class I antigens. *Arch. Virol.* **156**, 219-234 (2011).
39. Nallaparaju, K. C. *et al.* Evasion of IFN- $\gamma$  signaling by *Francisella novicida* is dependent upon *Francisella* outer membrane protein C. *PLoS One* **6**, e18201 (2011).
40. Sanapala, S. *et al.* Perforin- and granzyme-mediated cytotoxic effector functions are essential for protection against *Francisella tularensis* following vaccination by the defined *F. tularensis* subsp. *novicida*  $\Delta fopC$  vaccine strain. *Infect. Immun.* **80**, 2177-2185 (2012).
41. Gil, H. *et al.* Deletion of TolC orthologs in *Francisella tularensis* identifies roles in multidrug resistance and virulence. *Proc. Natl. Acad. Sci. U.S.A.* **103**, 12897-12902 (2006).
42. Doyle, C. R., Pan, J. A., Mena, P., Zong, W. X. & Thanassi, D. G. TolC-dependent modulation of host cell death by the *Francisella tularensis* live vaccine strain. *Infect. Immun.* **82**, 2068-2078 (2014).
43. Su, J. *et al.* Genome-wide identification of *Francisella tularensis* virulence determinants. *Infect. Immun.* **75**, 3089-3101 (2007).
44. Hickey, A. J., Hazlett, K. R., Kirimanjeswara, G. S. & Metzger, D. W. Identification of *Francisella tularensis* outer membrane protein A (FopA) as a protective antigen for tularemia. *Vaccine* **29**, 6941-6947 (2011).

45. Tempel, R., Lai, X. H., Crosa, L., Kozlowicz, B. & Heffron, F. Attenuated *Francisella novicida* transposon mutants protect mice against wild-type challenge. *Infect. Immun.* **74**, 5095-5105 (2006).
46. Chong, A. *et al.* Structure-function analysis of DipA, a *Francisella tularensis* virulence factor required for intracellular replication. *PLoS One* **8**, e67965 (2013).
47. Kraemer, P. S. *et al.* Genome-wide screen in *Francisella novicida* for genes required for pulmonary and systemic infection in mice. *Infect. Immun.* **77**, 232-244 (2009).
48. Mitchell, S. L. *et al.* Deletion of the *Bacillus anthracis capB* homologue in *Francisella tularensis* subspecies *tularensis* generates an attenuated strain that protects mice against virulent tularaemia. *J. Med. Microbiol.* **59**, 1275-1284 (2010).
49. Jia, Q. *et al.* A *Francisella tularensis* live vaccine strain (LVS) mutant with a deletion in *capB*, encoding a putative capsular biosynthesis protein, is significantly more attenuated than LVS yet induces potent protective immunity in mice against *F. tularensis* challenge. *Infect. Immun.* **78**, 4341-4355 (2010).
50. Gómez-Puertas, P. *et al.* The African swine fever virus proteins p54 and p30 are involved in two distinct steps of virus attachment and both contribute to the antibody-mediated protective immune response. *Virology* **243**, 461-471 (1998).
51. Salas, M. L. & Andrés, G. African swine fever virus morphogenesis. *Virus Res.* **173**, 29-41 (2013).
52. Alonso, C. *et al.* African swine fever virus-cell interactions: from virus entry to cell survival. *Virus Res.* **173**, 42-57 (2013).
53. Alonso, C. *et al.* African swine fever virus protein p54 interacts with the microtubular motor complex through direct binding to light-chain dynein. *J. Virol.* **75**, 9819-9827 (2001).
54. Borca, M. V. *et al.* An African swine fever virus gene with similarity to the T-lymphocyte surface antigen CD2 mediates hemadsorption. *Virology* **199**, 463-468 (1994).
55. Rodríguez, J. M., Yáñez, R. J., Almazán, F., Viñuela, E. & Rodríguez, J. F. African swine fever virus encodes a CD2 homolog responsible for the adhesion of erythrocytes to infected cells. *J. Virol.* **67**, 5312-5320 (1993).
56. Borca, M. V. *et al.* Deletion of a CD2-like gene, *8-DR*, from African swine fever virus affects viral infection in domestic swine. *J. Virol.* **72**, 2881-2889 (1998).
57. Hurtado, C. *et al.* The C-type lectin homologue gene (EP153R) of African swine fever virus inhibits apoptosis both in virus infection and in heterologous expression. *Virology* **326**, 160-170 (2004).
58. Seiler, C. Y. *et al.* DNASU plasmid and PSI:Biological-Materials repositories: resources to accelerate biological research. *Nucleic Acids Res.* **42**, D1253-1260 (2014).
59. Sykes, K. F. & Johnston, S. A. Genetic live vaccines mimic the antigenicity but not pathogenicity of live viruses. *DNA Cell Biol.* **18**, 521-531 (1999).
60. Whitlock, G. C. *et al.* Protective antigens against glanders identified by expression library immunization. *Front. Microbiol.* **2**, 227 (2011).
